# Supplementary material for: A Proteomic View of the Cross-Talk Between Early Intestinal Microbiota and Poultry Immune System
Source: Front Physiol. 2020 Feb 13;11:20. doi: 10.3389/fphys.2020.00020 (PMC7031415; doi:10.3389/fphys.2020.00020)
Supplement: Supplementary file 4 [file Table_3.XLSX]

## Sheet: CF
Supplementary Table 3. Identified proteins in ileal tissue of broilers treated with Citrobacter freundii (CF) in ovo
Identified Proteins	Accession Number	T-Test (p-value)	Fold Change by Category
Prolyl 3-hydroxylase 1 OS=Gallus gallus GN=P3H1 PE=1 SV=1	sp|Q6JHU8|P3H1_CHICK	0.0031	3.2
14-3-3 protein zeta OS=Gallus gallus GN=YWHAZ PE=2 SV=1	sp|Q5ZKC9|1433Z_CHICK	0.0033	1.5
Trafficking protein particle complex subunit 11 OS=Gallus gallus GN=TRAPPC11 PE=2 SV=1	sp|Q5ZI89|TPC11_CHICK	0.0069	0
Protein-glutamine gamma-glutamyltransferase 2 OS=Gallus gallus GN=TGL2 PE=1 SV=3	Protein-glutamine gamma-glutamyltransferase 2 OS=Gallus gallus GN=TGL2 PE=1 SV=3	0.01	0.7
Triosephosphate isomerase OS=Gallus gallus GN=TPI1 PE=1 SV=2	sp|P00940|TPIS_CHICK	0.015	1.5
Angiotensin-converting enzyme (Fragment) OS=Gallus gallus GN=ACE PE=2 SV=1	sp|Q10751|ACE_CHICK	0.016	0.1
Microfibrillar-associated protein 1 OS=Gallus gallus GN=MFAP1 PE=2 SV=1	sp|P55080|MFAP1_CHICK	0.018	7.5
Programmed cell death protein 10 OS=Gallus gallus GN=PDCD10 PE=2 SV=1	Programmed cell deathprotein 10 OS=Gallus gallus GN=PDCD10 PE=2 SV=1	0.021	5.8
PDZ and LIM domain protein 4 OS=Gallus gallus GN=PDLIM4 PE=2 SV=1	sp|Q9PW72|PDLI4_CHICK	0.021	0.2
Twinfilin-2 OS=Gallus gallus GN=TWF2 PE=1 SV=1	Twinfilin-2 OS=Gallusgallus GN=TWF2 PE=1 SV=1	0.022	7.1
Integrin alpha-1 (Fragment) OS=Gallus gallus GN=ITGA1 PE=2 SV=1	sp|Q90615|ITA1_CHICK	0.026	1.6
Golgi apparatus protein 1 OS=Gallus gallus GN=GLG1 PE=1 SV=1	sp|Q02391|GSLG1_CHICK	0.028	0.5
Tyrosine--tRNA ligase, cytoplasmic OS=Gallus gallus GN=YARS PE=2 SV=1	sp|Q5ZJ08|SYYC_CHICK	0.031	0.5
Leucine-rich repeat-containing protein 40 OS=Gallus gallus GN=LRRC40 PE=2 SV=1	sp|Q5ZLN0|LRC40_CHICK	0.031	2.2
Fibrinogen beta chain (Fragment) OS=Gallus gallus GN=FGB PE=1 SV=1	Fibrinogen beta chain(Fragment) OS=Gallus gallus GN=FGB PE=1 SV=1	0.032	0.6
Poly [ADP-ribose] polymerase 1 OS=Gallus gallus GN=PARP1 PE=1 SV=2	sp|P26446|PARP1_CHICK	0.036	0.3
Mimecan OS=Gallus gallus GN=OGN PE=2 SV=1	sp|Q9W6H0|MIME_CHICK	0.037	1.6
Ras-related protein Rab-14 OS=Gallus gallus GN=RAB14 PE=2 SV=3	sp|Q5ZKU5|RAB14_CHICK	0.038	0.5
Lumican OS=Gallus gallus GN=LUM PE=1 SV=1	sp|P51890|LUM_CHICK	0.042	0.4
Protein XRP2 OS=Gallus gallus GN=RP2 PE=2 SV=3	sp|Q5ZHN4|XRP2_CHICK	0.051	0.3
Pyruvate kinase PKM OS=Gallus gallus GN=PKM PE=2 SV=2	sp|P00548|KPYM_CHICK	0.052	0.8
Peroxiredoxin-1 OS=Gallus gallus GN=PRDX1 PE=1 SV=1	sp|P0CB50|PRDX1_CHICK	0.052	0.6
Transgelin OS=Gallus gallus GN=TAGLN PE=1 SV=3	sp|P19966|TAGL_CHICK	0.057	2.1
Glutathione S-transferase OS=Gallus gallus PE=2 SV=1	sp|Q08392|GSTA1_CHICK	0.059	1.7
Bleomycin hydrolase OS=Gallus gallus GN=BLMH PE=1 SV=1	sp|P87362|BLMH_CHICK	0.059	0.4
Arylamine N-acetyltransferase, pineal gland isozyme NAT-3 OS=Gallus gallus PE=2 SV=1	Arylamine N-acetyltransferase, pineal gland isozyme NAT-3 OS=Gallus gallus PE=2 SV=1	0.059	2.6
Serine/threonine-protein phosphatase 2A 55 kDa regulatory subunit B delta isoform OS=Gallus gallus GN=PPP2R2D PE=2 SV=1	sp|Q5ZIY5|2ABD_CHICK	0.062	2
Argininosuccinate lyase OS=Gallus gallus GN=ASL2 PE=2 SV=1	sp|P05083|ARLY2_CHICK	0.064	2.2
Hydroxymethylglutaryl-CoA synthase, cytoplasmic OS=Gallus gallus GN=HMGCS1 PE=1 SV=1	sp|P23228|HMCS1_CHICK	0.064	0.3
Testin OS=Gallus gallus GN=TES PE=2 SV=1	sp|Q90YH9|TES_CHICK	0.067	0.4
Epithelial cell adhesion molecule OS=Gallus gallus GN=EPCAM PE=2 SV=1	sp|Q5F381|EPCAM_CHICK	0.069	0.7
Histone deacetylase 1 OS=Gallus gallus GN=HDAC1 PE=2 SV=1	Histone deacetylase 1OS=Gallus gallus GN=HDAC1 PE=2 SV=1	0.07	0.2
Receptor of activated protein C kinase 1 OS=Gallus gallus GN=RACK1 PE=2 SV=1	Receptor of activatedprotein C kinase 1 OS=Gallus gallus GN=RACK1 PE=2 SV=1	0.075	1.2
Translationally-controlled tumor protein homolog OS=Gallus gallus GN=TPT1 PE=2 SV=1	Translationally-controlled tumor protein homolog OS=Gallus gallus GN=TPT1 PE=2 SV=1	0.075	0.5
26S proteasome non-ATPase regulatory subunit 1 OS=Gallus gallus GN=PSMD1 PE=2 SV=1	26S proteasome non-ATPase regulatory subunit 1 OS=Gallus gallus GN=PSMD1 PE=2 SV=1	0.076	0.5
72 kDa type IV collagenase OS=Gallus gallus GN=MMP2 PE=1 SV=1	sp|Q90611|MMP2_CHICK	0.076	0
Vacuolar protein sorting-associated protein 29 OS=Gallus gallus GN=VPS29 PE=2 SV=1	sp|Q5ZIL2|VPS29_CHICK	0.076	0
Lipoma-preferred partner homolog OS=Gallus gallus GN=LPP PE=2 SV=1	sp|Q5F464|LPP_CHICK	0.079	1.3
Protein Hook homolog 1 OS=Gallus gallus GN=HOOK1 PE=2 SV=1	sp|Q5ZJ27|HOOK1_CHICK	0.09	0
Avidin OS=Gallus gallus GN=AVD PE=1 SV=3	sp|P02701|AVID_CHICK	0.099	6.2
Cathepsin D OS=Gallus gallus GN=CTSD PE=1 SV=1	Cathepsin D OS=Gallusgallus GN=CTSD PE=1 SV=1	0.1	1.8
60S ribosomal protein L22 OS=Gallus gallus GN=RPL22 PE=2 SV=1	60S ribosomal proteinL22 OS=Gallus gallus GN=RPL22 PE=2 SV=1	0.1	2
Non-histone chromosomal protein HMG-14A OS=Gallus gallus PE=3 SV=2	sp|P12902|HM14A_CHICK	0.1	0.3
Desmin OS=Gallus gallus GN=DES PE=1 SV=1	sp|P02542|DESM_CHICK	0.11	1.3
Sodium/potassium-transporting ATPase subunit alpha-2 OS=Gallus gallus GN=ATP1A2 PE=2 SV=1	sp|P24797|AT1A2_CHICK	0.11	0.7
Heterogeneous nuclear ribonucleoprotein D-like OS=Gallus gallus GN=HNRNPDL PE=2 SV=1	Heterogeneous nuclearribonucleoprotein D-like OS=Gallus gallus GN=HNRNPDL PE=2 SV=1	0.11	1.5
Endoplasmic reticulum resident protein 29 (Fragment) OS=Gallus gallus GN=ERP29 PE=1 SV=2	Endoplasmic reticulumresident protein 29 (Fragment) OS=Gallus gallus GN=ERP29 PE=1 SV=2	0.11	3.9
Isoform 6 of Tropomyosin alpha-1 chain OS=Gallus gallus GN=TPM1	sp|P04268-6|TPM1_CHICK	0.11	2.1
Exportin-7 OS=Gallus gallus GN=XPO7 PE=2 SV=1	sp|Q5ZLT0|XPO7_CHICK	0.11	0.4
Prolyl 4-hydroxylase subunit alpha-1 OS=Gallus gallus GN=P4HA1 PE=1 SV=1	sp|P16924|P4HA1_CHICK	0.11	0.6
Isoform 4 of CAP-Gly domain-containing linker protein 1 OS=Gallus gallus GN=CLIP1-DECOY	Isoform 4 of CAP-Gly domain-containing linker protein 1 OS=Gallus gallus GN=CLIP1-DECOY (+3)	0.11	INF
Isoform 5 of Tropomyosin alpha-1 chain OS=Gallus gallus GN=TPM1	sp|P04268-5|TPM1_CHICK	0.12	1.9
Eukaryotic translation initiation factor 5A-1 OS=Gallus gallus GN=EIF5A1 PE=1 SV=3	sp|Q09121|IF5A1_CHICK	0.12	1.5
NADH-cytochrome b5 reductase 2 OS=Gallus gallus GN=CYB5R2 PE=2 SV=1	sp|Q5ZHX7|NB5R2_CHICK	0.12	0.4
Serine/threonine-protein phosphatase 4 regulatory subunit 2 OS=Gallus gallus GN=PPP4R2 PE=2 SV=1	sp|Q5ZMU6|PP4R2_CHICK	0.12	INF
CCR4-NOT transcription complex subunit 10 OS=Gallus gallus GN=CNOT10 PE=2 SV=1	sp|Q5ZIW2|CNO10_CHICK	0.12	0.3
Dolichyl-diphosphooligosaccharide--protein glycosyltransferase 48 kDa subunit OS=Gallus gallus GN=DDOST PE=1 SV=1	Dolichyl-diphosphooligosaccharide--protein glycosyltransferase 48 kDa subunit OS=Gallus gallus GN=DDOST PE=1 SV=1	0.13	1.4
Casein kinase II subunit beta OS=Gallus gallus GN=CSNK2B PE=2 SV=1	sp|P67869|CSK2B_CHICK	0.13	0.5
Tyrosine-protein phosphatase non-receptor type 11 OS=Gallus gallus GN=PTPN11 PE=2 SV=1	sp|Q90687|PTN11_CHICK	0.13	0.4
Nucleophosmin OS=Gallus gallus GN=NPM1 PE=2 SV=1	sp|P16039|NPM_CHICK	0.14	1.8
Non-histone chromosomal protein HMG-17 OS=Gallus gallus GN=HMGN2 PE=1 SV=3	sp|P02314|HMGN2_CHICK	0.14	0.4
Fibronectin (Fragments) OS=Gallus gallus GN=FN1 PE=2 SV=3	sp|P11722|FINC_CHICK	0.15	0.7
Unconventional myosin-Ic OS=Gallus gallus GN=MYO1C PE=2 SV=1	sp|Q5ZLA6|MYO1C_CHICK	0.15	0.7
Isoform 2 of Tropomyosin alpha-1 chain OS=Gallus gallus GN=TPM1	sp|P04268-2|TPM1_CHICK	0.15	1.9
40S ribosomal protein S13 OS=Gallus gallus GN=RPS13 PE=2 SV=3	40S ribosomal proteinS13 OS=Gallus gallus GN=RPS13 PE=2 SV=3	0.15	2.5
45 kDa calcium-binding protein OS=Gallus gallus GN=SDF4 PE=2 SV=2	sp|Q5ZKE5|CAB45_CHICK	0.15	2.1
Ovalbumin OS=Gallus gallus GN=SERPINB14 PE=1 SV=2	sp|P01012|OVAL_CHICK	0.15	INF
Aminopeptidase Ey OS=Gallus gallus GN=ANPEP PE=1 SV=2	sp|O57579|AMPN_CHICK	0.16	1.3
Interferon-induced GTP-binding protein Mx OS=Gallus gallus GN=MX PE=2 SV=1	sp|Q90597|MX_CHICK	0.16	0.6
14-3-3 protein gamma OS=Gallus gallus GN=YWHAG PE=1 SV=1	sp|Q5F3W6|1433G_CHICK	0.16	1.6
60S ribosomal protein L10 (Fragment) OS=Gallus gallus GN=RPL10 PE=2 SV=1	60S ribosomal proteinL10 (Fragment) OS=Gallus gallus GN=RPL10 PE=2 SV=1	0.16	0.7
Adapter molecule crk OS=Gallus gallus GN=CRK PE=1 SV=1	sp|Q04929|CRK_CHICK	0.16	1.8
DNA replication licensing factor MCM3 OS=Gallus gallus GN=MCM3 PE=2 SV=1	sp|Q5ZMN2|MCM3_CHICK	0.16	0.3
Acidic leucine-rich nuclear phosphoprotein 32 family member B OS=Gallus gallus GN=ANP32B PE=2 SV=1	Acidic leucine-rich nuclear phosphoprotein 32 family member B OS=Gallus gallus GN=ANP32B PE=2 SV=1	0.16	1.7
S-phase kinase-associated protein 1 OS=Gallus gallus GN=SKP1 PE=2 SV=1	sp|Q5ZKF5|SKP1_CHICK	0.17	1.4
Histone H2A.Z OS=Gallus gallus GN=H2AFZ PE=1 SV=3	sp|Q5ZMD6|H2AZ_CHICK (+1)	0.17	1.4
Isoform 3 of Tropomyosin beta chain OS=Gallus gallus GN=TPM2	sp|P19352-3|TPM2_CHICK	0.17	1.8
Sodium/potassium-transporting ATPase subunit alpha-1 OS=Gallus gallus GN=ATP1A1 PE=2 SV=1	Sodium/potassium-transporting ATPase subunit alpha-1 OS=Gallus gallus GN=ATP1A1 PE=2 SV=1	0.18	0.8
Actin-related protein 3 OS=Gallus gallus GN=ACTR3 PE=2 SV=1	Actin-related protein3 OS=Gallus gallus GN=ACTR3 PE=2 SV=1	0.18	0.7
Elongation factor 1-beta OS=Gallus gallus GN=EEF1B PE=2 SV=3	sp|Q9YGQ1|EF1B_CHICK	0.18	1.7
Calcineurin B homologous protein 1 OS=Gallus gallus GN=CHP1 PE=1 SV=3	sp|Q5ZM44|CHP1_CHICK	0.18	0.5
Isoform 2 of Low-density lipoprotein receptor-related protein 1 OS=Gallus gallus GN=LRP1	sp|P98157-2|LRP1_CHICK (+1)	0.18	0.4
Nuclear cap-binding protein subunit 1 OS=Gallus gallus GN=NCBP1 PE=2 SV=1	sp|Q5ZJZ6|NCBP1_CHICK	0.18	0.2
Charged multivesicular body protein 6 OS=Gallus gallus GN=CHMP6 PE=2 SV=3	sp|Q5ZL55|CHMP6_CHICK	0.18	1.9
Lipase maturation factor 2 OS=Gallus gallus GN=LMF2 PE=2 SV=2	sp|Q5ZKZ9|LMF2_CHICK	0.18	0.3
Unconventional myosin-VI OS=Gallus gallus GN=MYO6 PE=1 SV=1	sp|Q9I8D1|MYO6_CHICK (+1)	0.19	0.7
Ras-related protein Rab-18 OS=Gallus gallus GN=RAB18 PE=2 SV=1	sp|Q5ZLG1|RAB18_CHICK	0.19	2
H/ACA ribonucleoprotein complex subunit 4 OS=Gallus gallus GN=DKC1 PE=2 SV=1	sp|Q5ZJH9|DKC1_CHICK	0.19	0.4
Ribosome maturation protein SBDS OS=Gallus gallus GN=SBDS PE=2 SV=1	sp|Q5ZIY4|SBDS_CHICK	0.19	0.2
WD40 repeat-containing protein SMU1 OS=Gallus gallus GN=SMU1 PE=2 SV=1	sp|Q5ZME8|SMU1_CHICK	0.19	0
Creatine kinase U-type, mitochondrial OS=Gallus gallus GN=CKMT1 PE=1 SV=1	sp|P70079|KCRU_CHICK	0.2	0.8
Signal transducer and activator of transcription 3 OS=Gallus gallus GN=STAT3 PE=1 SV=2	Signal transducer andactivator of transcription 3 OS=Gallus gallus GN=STAT3 PE=1 SV=2	0.2	0.7
Annexin A1 (Fragment) OS=Gallus gallus GN=ANXA1 PE=2 SV=1	Annexin A1 (Fragment)OS=Gallus gallus GN=ANXA1 PE=2 SV=1	0.2	1.5
Na(+)/H(+) exchange regulatory cofactor NHE-RF1 OS=Gallus gallus GN=SLC9A3R1 PE=2 SV=1	sp|Q5ZM14|NHRF1_CHICK	0.2	1.4
40S ribosomal protein S4 OS=Gallus gallus GN=RPS4 PE=2 SV=2	40S ribosomal proteinS4 OS=Gallus gallus GN=RPS4 PE=2 SV=2	0.2	0.8
60S ribosomal protein L30 OS=Gallus gallus GN=RPL30 PE=3 SV=2	60S ribosomal proteinL30 OS=Gallus gallus GN=RPL30 PE=3 SV=2	0.2	0.7
Collagen alpha-2(I) chain OS=Homo sapiens GN=COL1A2 PE=1 SV=7	sp|P08123|CO1A2_HUMAN	0.2	2
Adenylate kinase isoenzyme 1 OS=Gallus gallus GN=AK1 PE=1 SV=1	sp|P05081|KAD1_CHICK	0.2	1.9
Unconventional myosin-Va OS=Gallus gallus GN=MYO5A PE=1 SV=1	sp|Q02440|MYO5A_CHICK	0.2	0.4
SPARC OS=Gallus gallus GN=SPARC PE=2 SV=1	sp|P36377|SPRC_CHICK	0.2	0.2
Switch-associated protein 70 OS=Gallus gallus GN=SWAP70 PE=2 SV=1	sp|Q5F4B2|SWP70_CHICK	0.2	0
39S ribosomal protein L15, mitochondrial OS=Gallus gallus GN=MRPL15 PE=2 SV=1	39S ribosomal proteinL15, mitochondrial OS=Gallus gallus GN=MRPL15 PE=2 SV=1	0.2	0
40S ribosomal protein S17 OS=Gallus gallus GN=RPS17 PE=2 SV=3	40S ribosomal proteinS17 OS=Gallus gallus GN=RPS17 PE=2 SV=3	0.21	1.3
Cofilin-2 OS=Gallus gallus GN=CFL2 PE=1 SV=2	sp|P21566|COF2_CHICK	0.21	1.3
Protein transport protein Sec23A OS=Gallus gallus GN=SEC23A PE=2 SV=1	sp|Q5ZK03|SC23A_CHICK	0.21	0.6
E3 UFM1-protein ligase 1 OS=Gallus gallus GN=UFL1 PE=2 SV=1	sp|Q5ZMG1|UFL1_CHICK	0.21	0.5
Ectonucleoside triphosphate diphosphohydrolase 5 OS=Gallus gallus GN=ENTPD5 PE=3 SV=1	Ectonucleoside triphosphate diphosphohydrolase 5 OS=Gallus gallus GN=ENTPD5 PE=3 SV=1	0.21	0.5
Alpha-actinin-2 OS=Gallus gallus GN=ACTN2 PE=2 SV=1	sp|P20111|ACTN2_CHICK (+1)	0.21	0.4
Importin subunit alpha-5 OS=Gallus gallus GN=KPNA1 PE=2 SV=1	sp|Q5ZML1|IMA5_CHICK	0.21	0.2
Basic leucine zipper and W2 domain-containing protein 2 OS=Gallus gallus GN=BZW2 PE=2 SV=1	sp|Q5ZL42|BZW2_CHICK	0.21	0
14-3-3 protein beta/alpha OS=Gallus gallus GN=YWHAB PE=2 SV=1	sp|Q5ZLQ6|1433B_CHICK	0.22	1.4
Cathepsin B OS=Gallus gallus GN=CTSB PE=2 SV=1	Cathepsin B OS=Gallusgallus GN=CTSB PE=2 SV=1	0.22	0.8
PDZ and LIM domain protein 7 OS=Gallus gallus GN=PDLIM7 PE=1 SV=1	sp|Q679P3|PDLI7_CHICK	0.22	0.6
Proteasome subunit alpha type-1 OS=Gallus gallus GN=PSMA1 PE=2 SV=2	sp|O42265|PSA1_CHICK	0.22	0.6
Fibulin-1 OS=Gallus gallus GN=FBLN1 PE=2 SV=2	sp|O73775|FBLN1_CHICK	0.22	1.4
Lens epithelium-derived growth factor OS=Gallus gallus GN=PSIP1 PE=2 SV=1	sp|Q5XXA9|PSIP1_CHICK	0.22	0.6
Flap endonuclease 1 OS=Gallus gallus GN=FEN1 PE=2 SV=1	sp|Q5ZLN4|FEN1_CHICK	0.22	0.4
Glutamate dehydrogenase 1, mitochondrial OS=Gallus gallus GN=GLUD1 PE=1 SV=1	sp|P00368|DHE3_CHICK	0.23	0.7
Brain acid soluble protein 1 homolog OS=Gallus gallus GN=BASP1 PE=2 SV=4	sp|P23614|BASP1_CHICK	0.23	1.2
Elastin (Fragment) OS=Gallus gallus GN=ELN PE=1 SV=1	sp|P07916|ELN_CHICK (+1)	0.23	0
Peroxiredoxin-6 OS=Gallus gallus GN=PRDX6 PE=2 SV=3	sp|Q5ZJF4|PRDX6_CHICK	0.24	1.4
Serine/arginine-rich splicing factor 2 OS=Gallus gallus GN=SRSF2 PE=2 SV=1	sp|P30352|SRSF2_CHICK	0.24	1.8
Myosin regulatory light chain 2, smooth muscle major isoform OS=Gallus gallus PE=1 SV=2	sp|P02612|MLRM_CHICK	0.25	1.5
Annexin A6 OS=Gallus gallus GN=ANXA6 PE=2 SV=1	sp|P51901|ANXA6_CHICK	0.25	0.8
Membrane-associated progesterone receptor component 1 OS=Gallus gallus GN=PGRMC1 PE=2 SV=3	sp|Q5ZKN2|PGRC1_CHICK	0.25	0.7
Eukaryotic translation initiation factor 1 (Fragment) OS=Gallus gallus GN=EIF1 PE=3 SV=1	Eukaryotic translation initiation factor 1 (Fragment) OS=Gallus gallus GN=EIF1 PE=3 SV=1	0.25	0.6
Ubiquitin-fold modifier 1 OS=Gallus gallus GN=UFM1 PE=3 SV=1	sp|Q5ZMK7|UFM1_CHICK	0.25	0.6
Endothelial differentiation-related factor 1 homolog OS=Gallus gallus GN=EDF1 PE=2 SV=1	sp|Q5ZMC0|EDF1_CHICK	0.25	0.5
Protein CASC4 OS=Gallus gallus GN=CASC4 PE=2 SV=1	sp|Q5ZKQ5|CASC4_CHICK	0.25	1.3
Cyclin-dependent kinase 1 OS=Gallus gallus GN=CDK1 PE=1 SV=1	sp|P13863|CDK1_CHICK	0.25	0.5
Tubulin beta-7 chain OS=Gallus gallus PE=2 SV=1-DECOY	Tubulin beta-7 chain OS=Gallus gallus PE=2 SV=1-DECOY	0.25	2.5
Cytochrome c OS=Gallus gallus GN=CYC PE=1 SV=2	sp|P67881|CYC_CHICK	0.26	1.5
Non-specific lipid-transfer protein (Fragment) OS=Gallus gallus GN=SCP2 PE=2 SV=1	sp|Q07598|NLTP_CHICK	0.26	0.6
Creatine kinase B-type OS=Gallus gallus GN=CKB PE=1 SV=1	sp|P05122|KCRB_CHICK	0.27	0.9
Protein transport protein Sec31A OS=Gallus gallus GN=SEC31A PE=2 SV=1	sp|Q5F3X8|SC31A_CHICK	0.27	0.7
Putative helicase MOV-10 OS=Gallus gallus GN=MOV10 PE=2 SV=1	sp|Q5ZKD7|MOV10_CHICK	0.27	0.7
Serine/threonine-protein phosphatase 2A catalytic subunit alpha isoform OS=Gallus gallus GN=PPP2CA PE=2 SV=1	sp|P48463|PP2AA_CHICK	0.27	0.6
Protein kinase C and casein kinase substrate in neurons protein 2 OS=Gallus gallus GN=PACSIN2 PE=1 SV=1	sp|O13154|PACN2_CHICK	0.27	1.4
Ubiquitin-conjugating enzyme E2 variant 1 OS=Gallus gallus GN=UBE2V1 PE=2 SV=2	Ubiquitin-conjugatingenzyme E2 variant 1 OS=Gallus gallus GN=UBE2V1 PE=2 SV=2	0.27	0.5
7-methylguanosine phosphate-specific 5'-nucleotidase OS=Gallus gallus GN=NT5C3B PE=2 SV=1	sp|Q5ZKF6|5NT3B_CHICK	0.27	0.5
Non-histone chromosomal protein HMG-14B OS=Gallus gallus GN=HMG14 PE=3 SV=2	sp|P12274|HMGN1_CHICK	0.27	2.1
WD repeat-containing protein 1 OS=Homo sapiens GN=WDR1 PE=1 SV=4	sp|O75083|WDR1_HUMAN	0.27	2.4
WD repeat-containing protein 82 OS=Gallus gallus GN=WDR82 PE=2 SV=1	sp|Q5ZMV7|WDR82_CHICK	0.27	0.3
Collagen alpha-1(VI) chain OS=Gallus gallus GN=COL6A1 PE=2 SV=1	sp|P20785|CO6A1_CHICK	0.28	0.7
Lamin-B2 OS=Gallus gallus GN=LMNB2 PE=2 SV=1	sp|P14732|LMNB2_CHICK	0.28	1.2
Heat shock 70 kDa protein OS=Gallus gallus PE=1 SV=1	sp|P08106|HSP70_CHICK	0.28	0.8
Ribosomal protein S6 kinase 2 alpha OS=Gallus gallus GN=RPS6KA PE=2 SV=1	sp|P18652|KS6AA_CHICK	0.28	0.6
Acetyl-CoA carboxylase OS=Gallus gallus GN=ACAC PE=1 SV=1	sp|P11029|ACAC_CHICK	0.28	0.5
SWI/SNF-related matrix-associated actin-dependent regulator of chromatin subfamily B member 1 OS=Gallus gallus GN=SMARCB1 PE=2 SV=1	sp|Q5ZK40|SNF5_CHICK	0.28	0.7
Fatty acid-binding protein, brain OS=Gallus gallus GN=FABP7 PE=2 SV=2	sp|Q05423|FABP7_CHICK	0.28	2.2
Proteasome activator complex subunit 3 OS=Gallus gallus GN=PSME3 PE=1 SV=1	sp|Q5F3J5|PSME3_CHICK	0.28	2.8
Isoform 2 of Cadherin-13 OS=Gallus gallus GN=CDH13	sp|P33150-2|CAD13_CHICK (+1)	0.28	0.3
Actin, alpha cardiac muscle 1 OS=Gallus gallus GN=ACTC1 PE=3 SV=1	sp|P68034|ACTC_CHICK	0.29	0.8
Annexin A2 OS=Gallus gallus GN=ANXA2 PE=1 SV=2	sp|P17785|ANXA2_CHICK	0.29	1.4
Microtubule-associated protein RP/EB family member 1 OS=Gallus gallus GN=MAPRE1 PE=2 SV=1	sp|Q5ZLC7|MARE1_CHICK	0.29	0.8
Class I histocompatibility antigen, F10 alpha chain OS=Gallus gallus PE=2 SV=1	sp|P15979|HA1F_CHICK	0.29	1.9
Myotrophin OS=Gallus gallus GN=MTPN PE=3 SV=1	sp|Q91955|MTPN_CHICK	0.29	1.8
Protein piccolo (Fragment) OS=Gallus gallus GN=PCLO PE=2 SV=1	sp|Q9PU36|PCLO_CHICK	0.29	0
Cysteine and glycine-rich protein 1 OS=Gallus gallus GN=CSRP1 PE=1 SV=2	sp|P67966|CSRP1_CHICK	0.3	0.8
Cell division control protein 42 homolog OS=Gallus gallus GN=CDC42 PE=2 SV=1	Cell division controlprotein 42 homolog OS=Gallus gallus GN=CDC42 PE=2 SV=1	0.3	1.6
Adenylosuccinate synthetase isozyme 2 OS=Gallus gallus GN=ADSS PE=2 SV=1	sp|Q5ZJL5|PURA2_CHICK	0.3	0.6
Tapasin OS=Gallus gallus GN=TAPBP PE=2 SV=2	sp|O73895|TPSN_CHICK	0.3	0.5
Protein S100-A10 OS=Gallus gallus GN=S100A10 PE=3 SV=2	sp|P27003|S10AA_CHICK	0.3	INF
Eukaryotic translation initiation factor 2A OS=Gallus gallus GN=EIF2A PE=2 SV=1	sp|Q5ZKC1|EIF2A_CHICK	0.3	INF
Arf-GAP with coiled-coil, ANK repeat and PH domain-containing protein 2 OS=Gallus gallus GN=ACAP2 PE=2 SV=1	sp|Q5ZK62|ACAP2_CHICK	0.3	0.3
Lysozyme C OS=Gallus gallus GN=LYZ PE=1 SV=1	sp|P00698|LYSC_CHICK	0.3	INF
Eukaryotic translation initiation factor 5A-2 OS=Gallus gallus GN=EIF5A2 PE=1 SV=3	Eukaryotic translation initiation factor 5A-2 OS=Gallus gallus GN=EIF5A2 PE=1 SV=3	0.3	INF
Coiled-coil domain-containing protein 50 OS=Gallus gallus GN=CCDC50 PE=2 SV=1	sp|Q5ZM86|CCD50_CHICK	0.3	INF
Vacuolar protein sorting-associated protein 53 homolog OS=Gallus gallus GN=VPS53 PE=2 SV=1	Vacuolar protein sorting-associated protein 53 homolog OS=Gallus gallus GN=VPS53 PE=2 SV=1	0.3	INF
Arylamine N-acetyltransferase, liver isozyme OS=Gallus gallus PE=1 SV=1	sp|P12275|ARYL_CHICK	0.3	INF
Ufm1-specific protease 2 OS=Gallus gallus GN=UFSP2 PE=2 SV=1	sp|Q5ZIF3|UFSP2_CHICK	0.3	INF
Protein piccolo (Fragment) OS=Gallus gallus GN=PCLO PE=2 SV=1-DECOY	Protein piccolo (Fragment) OS=Gallus gallus GN=PCLO PE=2 SV=1-DECOY	0.3	INF
Nuclease-sensitive element-binding protein 1 OS=Gallus gallus GN=YBX1 PE=2 SV=1	sp|Q06066|YBOX1_CHICK	0.31	1.2
Hemoglobin subunit alpha-D OS=Gallus gallus GN=HBAD PE=1 SV=1	sp|P02001|HBAD_CHICK	0.31	1.5
Calcium/calmodulin-dependent protein kinase type II delta chain OS=Gallus gallus GN=CAMK2D PE=2 SV=1	Calcium/calmodulin-dependent protein kinase type II delta chain OS=Gallus gallus GN=CAMK2D PE=2 SV=1	0.31	1.4
Arginine--tRNA ligase, cytoplasmic OS=Gallus gallus GN=RARS PE=2 SV=1	sp|Q5ZM11|SYRC_CHICK	0.31	2.4
Tubulin alpha-8 chain (Fragment) OS=Gallus gallus PE=3 SV=1	Tubulin alpha-8 chain(Fragment) OS=Gallus gallus PE=3 SV=1	0.31	2.9
Ankyrin repeat and MYND domain-containing protein 2 OS=Gallus gallus GN=ANKMY2 PE=2 SV=1	sp|Q5ZMD2|ANKY2_CHICK	0.31	0.3
Myosin light chain kinase, smooth muscle OS=Gallus gallus GN=Mylk PE=1 SV=2	sp|P11799|MYLK_CHICK (+1)	0.32	0.8
Guanine nucleotide-binding protein G(i) subunit alpha-2 OS=Gallus gallus GN=GNAI2 PE=2 SV=2	Guanine nucleotide-binding protein G(i) subunit alpha-2 OS=Gallus gallus GN=GNAI2 PE=2 SV=2	0.32	0.7
40S ribosomal protein S15 OS=Gallus gallus GN=RPS15 PE=2 SV=2	40S ribosomal proteinS15 OS=Gallus gallus GN=RPS15 PE=2 SV=2	0.32	1.4
Caveolin-1 OS=Gallus gallus GN=CAV1 PE=2 SV=1	sp|P35431|CAV1_CHICK	0.32	0.7
Zinc finger protein ubi-d4 OS=Gallus gallus GN=REQ PE=2 SV=1	sp|P58268|REQU_CHICK	0.32	1.5
Alpha-N-acetylgalactosaminidase OS=Gallus gallus GN=NAGA PE=1 SV=1	sp|Q90744|NAGAB_CHICK	0.32	1.9
Cellular nucleic acid-binding protein OS=Gallus gallus GN=CNBP PE=2 SV=1	sp|O42395|CNBP_CHICK	0.32	3.2
Translocation protein SEC62 OS=Gallus gallus GN=SEC62 PE=2 SV=1	Translocation proteinSEC62 OS=Gallus gallus GN=SEC62 PE=2 SV=1	0.32	3.2
V-type proton ATPase 116 kDa subunit a isoform 1 OS=Gallus gallus GN=ATP6V0A1 PE=1 SV=1	sp|Q9I8D0|VPP1_CHICK	0.32	0.4
60S ribosomal protein L7 OS=Gallus gallus GN=RPL7 PE=2 SV=1	60S ribosomal proteinL7 OS=Gallus gallus GN=RPL7 PE=2 SV=1	0.33	0.7
40S ribosomal protein S6 OS=Gallus gallus GN=RPS6 PE=2 SV=1	40S ribosomal proteinS6 OS=Gallus gallus GN=RPS6 PE=2 SV=1	0.33	0.5
Thymocyte nuclear protein 1 OS=Gallus gallus GN=THYN1 PE=1 SV=1	sp|Q90679|THYN1_CHICK	0.33	0.6
Syntaxin-binding protein 1 OS=Gallus gallus GN=STXBP1 PE=2 SV=1	sp|Q6R748|STXB1_CHICK	0.33	0.5
Kinesin-like protein KIF2A OS=Gallus gallus GN=KIF2A PE=2 SV=2	sp|Q5ZKV8|KIF2A_CHICK	0.33	2.6
Procollagen-lysine,2-oxoglutarate 5-dioxygenase 1 OS=Gallus gallus GN=PLOD1 PE=1 SV=1	Procollagen-lysine,2-oxoglutarate 5-dioxygenase 1 OS=Gallus gallus GN=PLOD1 PE=1 SV=1	0.33	2.2
Actin, cytoplasmic type 5 OS=Gallus gallus PE=3 SV=1	sp|P53478|ACT5_CHICK	0.34	0.9
Protein DJ-1 OS=Gallus gallus GN=PARK7 PE=2 SV=1	sp|Q8UW59|PARK7_CHICK	0.34	1.3
DBIRD complex subunit ZNF326 OS=Gallus gallus GN=ZNF326 PE=2 SV=3	DBIRD complex subunitZNF326 OS=Gallus gallus GN=ZNF326 PE=2 SV=3	0.34	1.4
60S ribosomal protein L13 OS=Gallus gallus GN=RPL13 PE=2 SV=2	60S ribosomal proteinL13 OS=Gallus gallus GN=RPL13 PE=2 SV=2	0.34	0.7
WD repeat-containing protein 1 OS=Gallus gallus GN=WDR1 PE=2 SV=1	sp|O93277|WDR1_CHICK	0.35	0.8
60S acidic ribosomal protein P0 OS=Gallus gallus GN=RPLP0 PE=2 SV=1	sp|P47826|RLA0_CHICK	0.35	1.2
Transthyretin OS=Gallus gallus GN=TTR PE=1 SV=1	sp|P27731|TTHY_CHICK	0.35	1.6
Insulin-like growth factor 2 mRNA-binding protein 3 OS=Gallus gallus GN=IGF2BP3 PE=2 SV=1	Insulin-like growth factor 2 mRNA-binding protein 3 OS=Gallus gallus GN=IGF2BP3 PE=2 SV=1	0.35	0.7
High mobility group protein B3 OS=Gallus gallus GN=HMGB3 PE=2 SV=3	sp|P40618|HMGB3_CHICK	0.35	2.1
Nicalin OS=Gallus gallus GN=NCLN PE=2 SV=1	sp|Q5ZJH2|NCLN_CHICK	0.35	0.3
Myosin light chain 3, skeletal muscle isoform OS=Gallus gallus PE=1 SV=3	Myosin light chain 3,skeletal muscle isoform OS=Gallus gallus PE=1 SV=3 (+1)	0.35	0.2
Histone deacetylase 2 OS=Gallus gallus GN=HDAC2 PE=2 SV=1	Histone deacetylase 2OS=Gallus gallus GN=HDAC2 PE=2 SV=1	0.35	0.4
NADH-ubiquinone oxidoreductase chain 1 OS=Gallus gallus GN=MT-ND1 PE=3 SV=1	sp|P18936|NU1M_CHICK	0.35	3.2
60S ribosomal protein L5 OS=Gallus gallus GN=RPL5 PE=2 SV=2	60S ribosomal proteinL5 OS=Gallus gallus GN=RPL5 PE=2 SV=2	0.36	1.7
Pepsin A OS=Gallus gallus GN=PGA PE=1 SV=1	sp|P00793|PEPA_CHICK	0.36	2.2
ER lumen protein-retaining receptor 2 OS=Gallus gallus GN=KDELR2 PE=2 SV=1	sp|Q5ZKX9|ERD22_CHICK	0.36	3
Villin-1 OS=Gallus gallus GN=VIL1 PE=1 SV=2	sp|P02640|VILI_CHICK	0.37	0.9
Tensin OS=Gallus gallus GN=TNS PE=1 SV=2	sp|Q04205|TENS_CHICK	0.37	1.3
Coatomer subunit delta OS=Gallus gallus GN=ARCN1 PE=2 SV=1	sp|Q5ZL57|COPD_CHICK	0.37	1.4
Protein FAM49A OS=Gallus gallus GN=FAM49A PE=2 SV=1	sp|Q5ZI04|FA49A_CHICK	0.37	0.5
D-dopachrome decarboxylase OS=Gallus gallus GN=DDT PE=3 SV=1	sp|Q5ZMG0|DOPD_CHICK	0.37	2.4
116 kDa U5 small nuclear ribonucleoprotein component OS=Gallus gallus GN=EFTUD2 PE=2 SV=1	116 kDa U5 small nuclear ribonucleoprotein component OS=Gallus gallus GN=EFTUD2 PE=2 SV=1	0.38	0.8
Fibrinogen alpha chain OS=Gallus gallus GN=FGA PE=1 SV=4	sp|P14448|FIBA_CHICK (+1)	0.38	0.7
26S proteasome non-ATPase regulatory subunit 13 OS=Gallus gallus GN=PSMD13 PE=1 SV=1	26S proteasome non-ATPase regulatory subunit 13 OS=Gallus gallus GN=PSMD13 PE=1 SV=1	0.38	0.7
Tudor-interacting repair regulator protein OS=Gallus gallus GN=NUDT16L1 PE=1 SV=3	Tudor-interacting repair regulator protein OS=Gallus gallus GN=NUDT16L1 PE=1 SV=3	0.38	0.8
Sorbitol dehydrogenase OS=Gallus gallus GN=SORD PE=1 SV=1	sp|P0DMQ6|DHSO_CHICK	0.38	0.3
Isoform 2 of Tropomyosin beta chain OS=Gallus gallus GN=TPM2	sp|P19352-2|TPM2_CHICK	0.39	1.3
14-3-3 protein epsilon OS=Gallus gallus GN=YWHAE PE=1 SV=1	sp|Q5ZMT0|1433E_CHICK	0.39	1.2
Histone H3.3 OS=Gallus gallus GN=H3-IX PE=1 SV=2	sp|P84247|H33_CHICK	0.39	1.2
Surfeit locus protein 4 OS=Gallus gallus GN=SURF4 PE=2 SV=1	Surfeit locus protein4 OS=Gallus gallus GN=SURF4 PE=2 SV=1	0.39	0.6
Isoform Short of Protein max OS=Gallus gallus GN=MAX	sp|P52162-2|MAX_CHICK (+1)	0.39	0
TBC1 domain family member 23 OS=Gallus gallus GN=TBC1D23 PE=2 SV=1	sp|Q5F415|TBC23_CHICK	0.39	0
Ubiquitin carboxyl-terminal hydrolase 47 OS=Gallus gallus GN=USP47 PE=3 SV=1	sp|E1C1R4|UBP47_CHICK	0.39	0
Gag-Pro-Pol polyprotein OS=Avian leukosis virus RSA GN=gag-pro-pol PE=3 SV=2	sp|Q04095|POL_RSVSA (+3)	0.39	0
Spectrin alpha chain, non-erythrocytic 1 OS=Gallus gallus GN=SPTAN1 PE=1 SV=3-DECOY	Spectrin alpha chain,non-erythrocytic 1 OS=Gallus gallus GN=SPTAN1 PE=1 SV=3-DECOY	0.39	0
Tetratricopeptide repeat protein 27 OS=Gallus gallus GN=TTC27 PE=2 SV=1	sp|Q5F3K0|TTC27_CHICK	0.39	0
Sodium/potassium-transporting ATPase subunit alpha-2 OS=Gallus gallus GN=ATP1A2 PE=2 SV=1-DECOY	Sodium/potassium-transporting ATPase subunit alpha-2 OS=Gallus gallus GN=ATP1A2 PE=2 SV=1-DECOY	0.39	0
Low-density lipoprotein receptor-related protein 1 OS=Gallus gallus GN=LRP1 PE=2 SV=1	sp|P98157|LRP1_CHICK (+1)	0.39	0
Acetoacetyl-CoA synthetase OS=Gallus gallus GN=AACS PE=2 SV=1	sp|Q5ZLG0|AACS_CHICK	0.39	0
Kinetochore protein NDC80 homolog OS=Gallus gallus GN=NDC80 PE=1 SV=1-DECOY	Kinetochore protein NDC80 homolog OS=Gallus gallus GN=NDC80 PE=1 SV=1-DECOY	0.39	0
Rho family-interacting cell polarization regulator 2 OS=Gallus gallus GN=RIPOR2 PE=2 SV=1	sp|Q5F3L9|RIPR2_CHICK	0.39	0
Keratin, type II cytoskeletal cochleal OS=Gallus gallus PE=2 SV=1	sp|O93532|K2CO_CHICK	0.4	1.3
Dynactin subunit 2 OS=Gallus gallus GN=DCTN2 PE=2 SV=1	sp|Q9PTG6|DCTN2_CHICK	0.4	1.4
ATP-dependent RNA helicase DDX1 OS=Gallus gallus GN=DDX1 PE=1 SV=1	sp|Q90WU3|DDX1_CHICK	0.4	0.7
Lamin-B receptor OS=Gallus gallus GN=LBR PE=1 SV=1	sp|P23913|LBR_CHICK	0.4	0.7
Proteasome subunit alpha type-7 OS=Gallus gallus GN=PSMA7 PE=2 SV=1	sp|O13268|PSA7_CHICK	0.41	1.2
Sarcoplasmic/endoplasmic reticulum calcium ATPase 3 OS=Gallus gallus GN=ATP2A3 PE=2 SV=1	sp|Q9YGL9|AT2A3_CHICK (+1)	0.41	0.5
2-methoxy-6-polyprenyl-1,4-benzoquinol methylase, mitochondrial OS=Gallus gallus GN=COQ5 PE=2 SV=1	2-methoxy-6-polyprenyl-1,4-benzoquinol methylase, mitochondrial OS=Gallus gallus GN=COQ5 PE=2 SV=1	0.41	1.7
Protein disulfide-isomerase A3 OS=Gallus gallus GN=PDIA3 PE=2 SV=1	sp|Q8JG64|PDIA3_CHICK	0.42	1.1
WD repeat-containing protein 61 OS=Gallus gallus GN=WDR61 PE=2 SV=1	sp|Q5ZJH5|WDR61_CHICK	0.42	0.8
ADP-ribosylation factor 6 OS=Gallus gallus GN=ARF6 PE=2 SV=3	sp|P26990|ARF6_CHICK	0.42	0.6
cAMP-dependent protein kinase type I-alpha regulatory subunit OS=Gallus gallus GN=PRKAR1A PE=2 SV=1	cAMP-dependent protein kinase type I-alpha regulatory subunit OS=Gallus gallus GN=PRKAR1A PE=2 SV=1	0.42	0.6
Heat shock protein HSP 90-alpha OS=Gallus gallus GN=HSP90AA1 PE=3 SV=3	sp|P11501|HS90A_CHICK	0.43	0.8
14-3-3 protein theta OS=Gallus gallus GN=YWHAQ PE=1 SV=1	sp|Q5ZMD1|1433T_CHICK	0.43	1.2
Plastin-1 OS=Gallus gallus GN=PLS1 PE=1 SV=1	sp|P19179|PLSI_CHICK	0.43	0.8
Far upstream element-binding protein 2 OS=Gallus gallus GN=KHSRP PE=1 SV=1	sp|Q8UVD9|FUBP2_CHICK	0.43	1.2
Farnesyl pyrophosphate synthase OS=Gallus gallus GN=FDPS PE=1 SV=2	sp|P08836|FPPS_CHICK	0.43	1.4
Tyrosine-protein kinase Yes OS=Gallus gallus GN=YES1 PE=1 SV=3	sp|P09324|YES_CHICK	0.43	0.4
Adenylosuccinate lyase OS=Gallus gallus GN=ADSL PE=2 SV=2	sp|P21265|PUR8_CHICK	0.43	0.6
Unconventional myosin-Ia OS=Gallus gallus GN=MYO1A PE=1 SV=2	sp|P47807|MYO1A_CHICK	0.44	0.8
Collagen alpha-1(XII) chain OS=Gallus gallus GN=COL12A1 PE=1 SV=3	Collagen alpha-1(XII)chain OS=Gallus gallus GN=COL12A1 PE=1 SV=3	0.44	0.8
Aspartate aminotransferase, mitochondrial OS=Gallus gallus GN=GOT2 PE=1 SV=2	sp|P00508|AATM_CHICK	0.44	0.8
Core histone macro-H2A.1 OS=Gallus gallus GN=H2AFY PE=1 SV=3	sp|O93327|H2AY_CHICK	0.44	1.3
NADH-ubiquinone oxidoreductase chain 4 OS=Gallus gallus GN=MT-ND4 PE=3 SV=1	sp|P18939|NU4M_CHICK	0.44	0.8
NEDD8-activating enzyme E1 regulatory subunit OS=Gallus gallus GN=NAE1 PE=2 SV=1	NEDD8-activating enzyme E1 regulatory subunit OS=Gallus gallus GN=NAE1 PE=2 SV=1	0.44	0.6
Dual specificity mitogen-activated protein kinase kinase 2 OS=Gallus gallus GN=MAP2K2 PE=2 SV=1	Dual specificity mitogen-activated protein kinase kinase 2 OS=Gallus gallus GN=MAP2K2 PE=2 SV=1	0.44	0.7
60S ribosomal protein L37a OS=Gallus gallus GN=RPL37A PE=3 SV=2	60S ribosomal proteinL37a OS=Gallus gallus GN=RPL37A PE=3 SV=2	0.44	1.5
Glutamine synthetase OS=Gallus gallus GN=GLUL PE=1 SV=1	sp|P16580|GLNA_CHICK	0.44	0.3
Talin-1 OS=Gallus gallus GN=TLN1 PE=1 SV=2	sp|P54939|TLN1_CHICK	0.45	0.9
ATP synthase subunit beta, mitochondrial OS=Gallus gallus GN=ATP5B PE=1 SV=1	sp|Q5ZLC5|ATPB_CHICK	0.45	1.1
Uncharacterized protein KIAA1671 homolog OS=Gallus gallus GN=RCJMB04_21h11 PE=2 SV=1	Uncharacterized protein KIAA1671 homolog OS=Gallus gallus GN=RCJMB04_21h11 PE=2 SV=1	0.45	0.5
Heat shock 70 kDa protein 14 OS=Gallus gallus GN=HSPA14 PE=3 SV=1	sp|E1C2P3|HSP7E_CHICK	0.45	2.1
Inosine triphosphate pyrophosphatase OS=Gallus gallus GN=ITPA PE=3 SV=2	sp|F1NLH9|ITPA_CHICK	0.45	0.4
B-cadherin (Fragment) OS=Gallus gallus GN=K-CAM PE=2 SV=1	B-cadherin (Fragment)OS=Gallus gallus GN=K-CAM PE=2 SV=1	0.45	1.8
Ubiquitin carboxyl-terminal hydrolase 10 OS=Gallus gallus GN=USP10 PE=2 SV=1	sp|Q5ZJN4|UBP10_CHICK	0.45	1.8
Prolyl 4-hydroxylase subunit alpha-2 OS=Gallus gallus GN=P4HA2 PE=2 SV=1	sp|Q5ZLK5|P4HA2_CHICK	0.45	3.9
Catenin alpha-2 OS=Gallus gallus GN=CTNNA2 PE=1 SV=1	sp|P30997|CTNA2_CHICK	0.46	0.7
Hydroxymethylglutaryl-CoA lyase, mitochondrial OS=Gallus gallus GN=HMGCL PE=1 SV=1	sp|P35915|HMGCL_CHICK	0.46	0.7
Xanthine dehydrogenase/oxidase OS=Gallus gallus GN=XDH PE=1 SV=1	sp|P47990|XDH_CHICK	0.46	0.6
Stress-70 protein, mitochondrial OS=Gallus gallus GN=HSPA9 PE=1 SV=1	sp|Q5ZM98|GRP75_CHICK	0.47	1.1
DnaJ homolog subfamily B member 6 OS=Gallus gallus GN=DNAJB6 PE=2 SV=1	sp|Q5F3Z5|DNJB6_CHICK	0.47	1.4
Vesicle-trafficking protein SEC22b OS=Gallus gallus GN=SEC22B PE=2 SV=1	sp|Q5ZJW4|SC22B_CHICK	0.47	0.7
Ras-related protein Rap-1b OS=Gallus gallus GN=RAP1B PE=2 SV=1	sp|Q5ZHX1|RAP1B_CHICK	0.48	0.7
Carbonic anhydrase 2 OS=Gallus gallus GN=CA2 PE=2 SV=3	sp|P07630|CAH2_CHICK	0.48	0.7
High mobility group protein B2 OS=Gallus gallus GN=HMGB2 PE=2 SV=2-DECOY	High mobility group protein B2 OS=Gallus gallus GN=HMGB2 PE=2 SV=2-DECOY	0.48	1.5
Protein FAM210A OS=Gallus gallus GN=FAM210A PE=2 SV=1	sp|Q5ZML6|F210A_CHICK	0.48	1.3
Epithelial splicing regulatory protein 2 OS=Gallus gallus GN=ESRP2 PE=2 SV=1	sp|Q5ZLR4|ESRP2_CHICK	0.48	0.4
Putative ATP-dependent RNA helicase DHX30 OS=Gallus gallus GN=DHX30 PE=2 SV=1	sp|Q5ZI74|DHX30_CHICK	0.48	0.4
Microtubule-associated protein RP/EB family member 2 OS=Gallus gallus GN=MAPRE2 PE=2 SV=1	Microtubule-associated protein RP/EB family member 2 OS=Gallus gallus GN=MAPRE2 PE=2 SV=1	0.48	0.4
Serum albumin OS=Gallus gallus GN=ALB PE=1 SV=2	sp|P19121|ALBU_CHICK	0.49	0.8
Histone H2A.J OS=Gallus gallus GN=H2A-IX PE=3 SV=1	sp|P70082|H2AJ_CHICK	0.49	1.2
T-complex protein 1 subunit zeta OS=Gallus gallus GN=CCT6 PE=1 SV=3	sp|Q5ZJ54|TCPZ_CHICK	0.49	0.8
Proliferating cell nuclear antigen OS=Gallus gallus GN=PCNA PE=1 SV=1	sp|Q9DEA3|PCNA_CHICK	0.49	0.8
Cytoplasmic dynein 1 light intermediate chain 1 OS=Gallus gallus GN=DYNC1LI1 PE=1 SV=1	Cytoplasmic dynein 1 light intermediate chain 1 OS=Gallus gallus GN=DYNC1LI1 PE=1 SV=1	0.49	0.9
Isoform 10 of Agrin OS=Gallus gallus GN=AGRN	sp|P31696-10|AGRIN_CHICK (+8)	0.49	0.6
Hsc70-interacting protein OS=Gallus gallus GN=ST13 PE=2 SV=1	sp|Q5ZLF0|F10A1_CHICK	0.49	0.5
E3 ubiquitin-protein ligase BRE1A OS=Gallus gallus GN=RNF20 PE=2 SV=1	sp|Q5ZLS3|BRE1A_CHICK	0.49	0.6
Isoform Bb-CK-4 of Creatine kinase B-type OS=Gallus gallus GN=CKB	sp|P05122-5|KCRB_CHICK	0.49	0.7
Transcription factor SOX-1 OS=Gallus gallus GN=SOX1 PE=2 SV=1	sp|O57401|SOX1_CHICK	0.49	0.4
Tubulin alpha-1 chain (Fragment) OS=Gallus gallus PE=1 SV=1	Tubulin alpha-1 chain(Fragment) OS=Gallus gallus PE=1 SV=1	0.5	1.2
Hemoglobin subunit alpha-A OS=Gallus gallus GN=HBAA PE=1 SV=2	sp|P01994|HBA_CHICK	0.5	0.7
60S acidic ribosomal protein P1 OS=Gallus gallus GN=RPLP1 PE=3 SV=1	sp|P18660|RLA1_CHICK	0.5	1.3
Ubiquitin-40S ribosomal protein S27a OS=Gallus gallus GN=RPS27A PE=2 SV=3	sp|P79781|RS27A_CHICK	0.5	0.9
Succinate dehydrogenase [ubiquinone] iron-sulfur subunit, mitochondrial OS=Gallus gallus GN=SDHB PE=1 SV=1	sp|Q9YHT2|SDHB_CHICK	0.5	0.7
Asparagine synthetase [glutamine-hydrolyzing] OS=Gallus gallus GN=ASNS PE=2 SV=3	Asparagine synthetase[glutamine-hydrolyzing] OS=Gallus gallus GN=ASNS PE=2 SV=3	0.5	0.7
Sister chromatid cohesion protein PDS5 homolog B OS=Gallus gallus GN=PDS5B PE=2 SV=3	Sister chromatid cohesion protein PDS5 homolog B OS=Gallus gallus GN=PDS5B PE=2 SV=3	0.51	0.7
Caldesmon OS=Gallus gallus GN=CALD1 PE=1 SV=2	sp|P12957|CALD1_CHICK	0.52	0.9
Cadherin-1 OS=Gallus gallus GN=CDH1 PE=1 SV=2	sp|P08641|CADH1_CHICK	0.52	1.2
Cytochrome b-c1 complex subunit Rieske, mitochondrial OS=Gallus gallus GN=UQCRFS1 PE=1 SV=1	sp|Q5ZLR5|UCRI_CHICK	0.52	1.2
High mobility group protein B1 OS=Gallus gallus GN=HMGB1 PE=1 SV=1	sp|Q9YH06|HMGB1_CHICK	0.52	1.3
Apolipoprotein A-I OS=Gallus gallus GN=APOA1 PE=1 SV=2	sp|P08250|APOA1_CHICK	0.52	1.3
Ras-related protein Rab-8A OS=Gallus gallus GN=RAB8A PE=2 SV=1	sp|Q5F470|RAB8A_CHICK	0.52	0.4
Calbindin OS=Gallus gallus GN=CALB1 PE=1 SV=3	sp|P04354|CALB1_CHICK	0.53	0.9
Nuclear migration protein nudC OS=Gallus gallus GN=NUDC PE=2 SV=1	sp|Q5ZIN1|NUDC_CHICK	0.53	0.8
Glycerol-3-phosphate phosphatase OS=Gallus gallus GN=PGP PE=2 SV=1	sp|Q5F4B1|PGP_CHICK	0.53	1.3
Basic leucine zipper and W2 domain-containing protein 1 OS=Gallus gallus GN=BZW1 PE=2 SV=1	Basic leucine zipper and W2 domain-containing protein 1 OS=Gallus gallus GN=BZW1 PE=2 SV=1	0.53	1.3
Protein S100-A11 OS=Gallus gallus GN=S100A11 PE=1 SV=2	sp|P24479|S10AB_CHICK	0.53	0.7
ER membrane protein complex subunit 1 OS=Gallus gallus GN=EMC1 PE=2 SV=1	sp|Q5ZL00|EMC1_CHICK	0.53	0.5
Methylthioribulose-1-phosphate dehydratase OS=Gallus gallus GN=APIP PE=2 SV=1	sp|Q5ZLP2|MTNB_CHICK	0.53	0.6
GTPase NRas OS=Gallus gallus GN=NRAS PE=2 SV=1	GTPase NRas OS=Gallusgallus GN=NRAS PE=2 SV=1	0.53	0.6
MOB-like protein phocein OS=Gallus gallus GN=MOB4 PE=2 SV=1	sp|Q5F495|PHOCN_CHICK	0.53	2
Endoplasmin OS=Gallus gallus GN=HSP90B1 PE=1 SV=1	Endoplasmin OS=Gallusgallus GN=HSP90B1 PE=1 SV=1	0.54	0.9
Serine/threonine-protein phosphatase PP1-beta catalytic subunit OS=Gallus gallus GN=PPP1CB PE=1 SV=3	sp|P62207|PP1B_CHICK	0.54	1.2
Hsp90 co-chaperone Cdc37 OS=Gallus gallus GN=CDC37 PE=2 SV=1	sp|O57476|CDC37_CHICK	0.54	0.8
Coatomer subunit epsilon OS=Gallus gallus GN=COPE PE=2 SV=1	sp|Q5ZIK9|COPE_CHICK	0.54	0.9
Guanine nucleotide-binding protein G(i) subunit alpha-1 OS=Gallus gallus GN=GNAI1 PE=2 SV=2	sp|P50146|GNAI1_CHICK	0.54	0.7
Cysteine and histidine-rich domain-containing protein 1 OS=Gallus gallus GN=CHORDC1 PE=2 SV=1	sp|Q5ZML4|CHRD1_CHICK	0.54	1.3
60S ribosomal protein L15 (Fragment) OS=Gallus gallus GN=RPL15 PE=3 SV=1	60S ribosomal proteinL15 (Fragment) OS=Gallus gallus GN=RPL15 PE=3 SV=1	0.55	0.8
FERM, RhoGEF and pleckstrin domain-containing protein 1 OS=Gallus gallus GN=FARP1 PE=1 SV=2	FERM, RhoGEF and pleckstrin domain-containing protein 1 OS=Gallus gallus GN=FARP1 PE=1 SV=2	0.55	2.6
Signal transducing adapter molecule 2 OS=Gallus gallus GN=STAM2 PE=1 SV=1	sp|O93436|STAM2_CHICK	0.55	0.4
Fructose-bisphosphate aldolase B OS=Gallus gallus GN=ALDOB PE=3 SV=3	Fructose-bisphosphatealdolase B OS=Gallus gallus GN=ALDOB PE=3 SV=3	0.56	0.9
Adenosine deaminase OS=Gallus gallus GN=ADA PE=2 SV=1	sp|Q5ZKP6|ADA_CHICK	0.56	0.9
Decorin OS=Gallus gallus GN=DCN PE=1 SV=1	sp|P28675|PGS2_CHICK	0.56	0.8
UDP-glucose 6-dehydrogenase OS=Gallus gallus GN=UGDH PE=2 SV=1	sp|Q5F3T9|UGDH_CHICK	0.56	0.8
Phosphoenolpyruvate carboxykinase [GTP], mitochondrial OS=Gallus gallus GN=PCK2 PE=1 SV=2	Phosphoenolpyruvate carboxykinase [GTP], mitochondrial OS=Gallus gallus GN=PCK2 PE=1 SV=2	0.56	0.7
CAP-Gly domain-containing linker protein 1 OS=Gallus gallus GN=CLIP1 PE=2 SV=1	sp|O42184|CLIP1_CHICK (+3)	0.56	0.8
Collagen alpha-2(I) chain OS=Gallus gallus GN=COL1A2 PE=1 SV=3	sp|P02467|CO1A2_CHICK	0.56	1.3
Sister chromatid cohesion protein PDS5 homolog A OS=Gallus gallus GN=PDS5A PE=2 SV=2	sp|Q5F3V3|PDS5A_CHICK	0.56	0.8
N-fatty-acyl-amino acid synthase/hydrolase PM20D1 OS=Gallus gallus GN=PM20D1 PE=2 SV=1	N-fatty-acyl-amino acid synthase/hydrolase PM20D1 OS=Gallus gallus GN=PM20D1 PE=2 SV=1	0.56	1.2
Small nuclear ribonucleoprotein-associated protein B' OS=Gallus gallus GN=SNRPB PE=2 SV=1	sp|Q9PV94|RSMB_CHICK	0.56	0.8
Fatty acid-binding protein, smooth muscle (Fragments) OS=Gallus gallus GN=FABP PE=1 SV=2	sp|P80565|FABPM_CHICK	0.56	1.5
Unconventional myosin-Ig OS=Gallus gallus GN=MYO1G PE=2 SV=1	sp|Q5ZMC2|MYO1G_CHICK	0.56	0.7
Isoform 2 of Alpha-actinin-1 OS=Gallus gallus GN=ACTN1	sp|P05094-2|ACTN1_CHICK	0.57	0.9
Heat shock cognate 71 kDa protein OS=Gallus gallus GN=HSPA8 PE=1 SV=1	Heat shock cognate 71kDa protein OS=Gallus gallus GN=HSPA8 PE=1 SV=1	0.57	1.1
Cytochrome c oxidase subunit 1 OS=Gallus gallus GN=MT-CO1 PE=3 SV=1	sp|P18943|COX1_CHICK	0.57	0.6
Growth factor receptor-bound protein 2 OS=Gallus gallus GN=GRB2 PE=1 SV=1	sp|Q07883|GRB2_CHICK	0.57	0.7
High mobility group protein B2 OS=Gallus gallus GN=HMGB2 PE=2 SV=2	sp|P26584|HMGB2_CHICK	0.57	1.2
Serine/arginine repetitive matrix protein 1 OS=Gallus gallus GN=SRRM1 PE=2 SV=1	sp|Q5ZMJ9|SRRM1_CHICK	0.57	1.3
Occludin OS=Gallus gallus GN=OCLN PE=1 SV=1	sp|Q91049|OCLN_CHICK	0.57	1.9
Spliceosome RNA helicase DDX39B OS=Gallus gallus GN=DDX39B PE=2 SV=1	sp|Q5ZHZ0|DX39B_CHICK	0.58	0.8
Eukaryotic translation initiation factor 2 subunit 1 OS=Gallus gallus GN=EIF2S1 PE=2 SV=2	sp|Q5ZLX2|IF2A_CHICK	0.58	1.2
Calmodulin OS=Gallus gallus GN=CALM PE=1 SV=2	sp|P62149|CALM_CHICK	0.58	0.8
Multifunctional protein ADE2 OS=Gallus gallus GN=AIRC PE=2 SV=1	sp|P38024|PUR6_CHICK	0.58	0.8
Dolichyl-diphosphooligosaccharide--protein glycosyltransferase subunit DAD1 OS=Gallus gallus GN=DAD1 PE=2 SV=1	Dolichyl-diphosphooligosaccharide--protein glycosyltransferase subunit DAD1 OS=Gallus gallus GN=DAD1 PE=2 SV=1	0.58	1.2
Small nuclear ribonucleoprotein E OS=Gallus gallus GN=SNRPE PE=3 SV=1	sp|P62303|RUXE_CHICK	0.58	0.7
DCN1-like protein 1 OS=Gallus gallus GN=DCUN1D1 PE=2 SV=1	sp|Q5ZKU1|DCNL1_CHICK	0.58	0.6
Target of Myb protein 1 OS=Gallus gallus GN=TOM1 PE=2 SV=2	Target of Myb protein1 OS=Gallus gallus GN=TOM1 PE=2 SV=2	0.58	2.4
Myristoylated alanine-rich C-kinase substrate OS=Gallus gallus GN=MARCKS PE=1 SV=2	sp|P16527|MARCS_CHICK	0.59	1.1
Isoform 2 of F-actin-capping protein subunit beta isoforms 1 and 2 OS=Gallus gallus GN=CAPZB	sp|P14315-2|CAPZB_CHICK	0.59	1.2
Myosin light chain, embryonic OS=Gallus gallus PE=2 SV=1	sp|P09540|MLEX_CHICK	0.59	1.2
Cytochrome b5 OS=Gallus gallus GN=CYB5A PE=1 SV=4	sp|P00174|CYB5_CHICK	0.59	0.8
Serine/threonine-protein kinase TAO3 OS=Gallus gallus GN=TAOK3 PE=2 SV=2	sp|Q9I9E0|TAOK3_CHICK	0.59	1.7
Hypoxanthine-guanine phosphoribosyltransferase OS=Gallus gallus GN=HPRT1 PE=2 SV=1	Hypoxanthine-guanine phosphoribosyltransferase OS=Gallus gallus GN=HPRT1 PE=2 SV=1	0.59	0.5
Actin-related protein 2 OS=Gallus gallus GN=ACTR2 PE=2 SV=1	Actin-related protein2 OS=Gallus gallus GN=ACTR2 PE=2 SV=1	0.6	0.9
Low molecular weight phosphotyrosine protein phosphatase OS=Gallus gallus GN=ACP1 PE=2 SV=3	Low molecular weight phosphotyrosine protein phosphatase OS=Gallus gallus GN=ACP1 PE=2 SV=3	0.6	1.1
Isoleucine--tRNA ligase, mitochondrial OS=Gallus gallus GN=IARS2 PE=2 SV=1	sp|Q5ZKA2|SYIM_CHICK	0.6	0.8
Eukaryotic translation initiation factor 3 subunit H OS=Gallus gallus GN=EIF3H PE=2 SV=1	sp|Q5ZLE6|EIF3H_CHICK	0.6	1.5
Phosphatidylinositol 5-phosphate 4-kinase type-2 alpha OS=Gallus gallus GN=PIP4K2A PE=2 SV=1	Phosphatidylinositol 5-phosphate 4-kinase type-2 alpha OS=Gallus gallus GN=PIP4K2A PE=2 SV=1	0.6	1.5
Receptor-type tyrosine-protein phosphatase S OS=Gallus gallus GN=PTPRS PE=1 SV=3	sp|F1NWE3|PTPRS_CHICK (+1)	0.6	0.6
Acyl-CoA-binding protein OS=Gallus gallus GN=DBI PE=1 SV=1	sp|Q9PRL8|ACBP_CHICK	0.6	0.5
L-lactate dehydrogenase A chain OS=Gallus gallus GN=LDHA PE=1 SV=3	sp|P00340|LDHA_CHICK	0.61	1.1
26S proteasome regulatory subunit 4 OS=Gallus gallus GN=PSMC1 PE=2 SV=1	sp|Q90732|PRS4_CHICK	0.61	1.2
Zyxin OS=Gallus gallus GN=ZYX PE=1 SV=1	sp|Q04584|ZYX_CHICK	0.61	1.2
Rho-related GTP-binding protein RhoC OS=Gallus gallus GN=RHOC PE=1 SV=1	sp|Q9PSX7|RHOC_CHICK	0.61	0.8
Protein polybromo-1 OS=Gallus gallus GN=PBRM1 PE=1 SV=1	sp|Q90941|PB1_CHICK	0.61	0.8
Serpin H1 OS=Gallus gallus GN=SERPINH1 PE=1 SV=2	sp|P13731|SERPH_CHICK	0.62	1.1
Vigilin OS=Gallus gallus GN=HDLBP PE=2 SV=1	sp|P81021|VIGLN_CHICK	0.62	0.9
Calpain-1 catalytic subunit OS=Gallus gallus PE=1 SV=2	sp|P00789|CANX_CHICK	0.62	0.9
Osteoclast-stimulating factor 1 OS=Gallus gallus GN=OSTF1 PE=2 SV=1	sp|Q5ZJJ9|OSTF1_CHICK	0.62	0.8
Lamin-B1 OS=Gallus gallus GN=LMNB1 PE=2 SV=1	sp|P14731|LMNB1_CHICK	0.62	0.8
Ras-related protein Rab-5C OS=Gallus gallus GN=RAB5C PE=1 SV=1	sp|Q98932|RAB5C_CHICK	0.62	0.7
Laminin subunit beta-1 (Fragment) OS=Gallus gallus GN=LAMB1 PE=2 SV=1	sp|Q01635|LAMB1_CHICK	0.62	1.1
Beta-galactoside-binding lectin OS=Gallus gallus PE=1 SV=2	sp|P07583|LEG4_CHICK	0.62	0.7
Heme-binding protein 1 OS=Gallus gallus GN=HEBP1 PE=2 SV=1	sp|Q5ZMB2|HEBP1_CHICK	0.62	1.4
Heme oxygenase 1 OS=Gallus gallus GN=HMOX1 PE=1 SV=2	sp|P14791|HMOX1_CHICK	0.62	1.6
60S ribosomal protein L26 (Fragment) OS=Gallus gallus GN=RPL26 PE=2 SV=1	60S ribosomal proteinL26 (Fragment) OS=Gallus gallus GN=RPL26 PE=2 SV=1	0.62	1.7
Glycine cleavage system H protein, mitochondrial OS=Gallus gallus GN=GCSH PE=1 SV=2	sp|P11183|GCSH_CHICK	0.62	0.6
Collagen alpha-3(VI) chain OS=Gallus gallus GN=COL6A3 PE=2 SV=2	sp|P15989|CO6A3_CHICK	0.63	0.9
Cytoplasmic aconitate hydratase OS=Gallus gallus GN=ACO1 PE=2 SV=1	Cytoplasmic aconitatehydratase OS=Gallus gallus GN=ACO1 PE=2 SV=1	0.63	0.9
Septin-2 OS=Gallus gallus GN=SEPT2 PE=2 SV=1	sp|Q5ZMH1|SEPT2_CHICK	0.64	1.2
Proteasome subunit beta type-5 (Fragment) OS=Gallus gallus GN=PSMB5 PE=2 SV=2	sp|P34065|PSB5_CHICK	0.64	0.9
Apoptosis inhibitor 5 OS=Gallus gallus GN=API5 PE=2 SV=1	Apoptosis inhibitor 5OS=Gallus gallus GN=API5 PE=2 SV=1	0.64	1.3
Thioredoxin OS=Gallus gallus GN=TXN PE=3 SV=2	Thioredoxin OS=Gallusgallus GN=TXN PE=3 SV=2	0.64	1.8
Sodium/potassium-transporting ATPase subunit beta-3 OS=Gallus gallus GN=ATP1B3 PE=2 SV=1	sp|P33879|AT1B3_CHICK	0.64	1.6
Zinc finger CCCH domain-containing protein 15 OS=Gallus gallus GN=ZC3H15 PE=1 SV=1	Zinc finger CCCH domain-containing protein 15 OS=Gallus gallus GN=ZC3H15 PE=1 SV=1	0.64	1.5
60 kDa heat shock protein, mitochondrial OS=Gallus gallus GN=HSPD1 PE=1 SV=1	sp|Q5ZL72|CH60_CHICK	0.65	1.1
Dystrophin OS=Gallus gallus GN=DMD PE=2 SV=1	sp|P11533|DMD_CHICK	0.65	0.9
Paxillin OS=Gallus gallus GN=PXN PE=1 SV=1	sp|P49024|PAXI_CHICK	0.65	1.2
Collagen alpha-1(I) chain OS=Gallus gallus GN=COL1A1 PE=1 SV=3	sp|P02457|CO1A1_CHICK	0.65	1.1
Transmembrane anterior posterior transformation protein 1 homolog OS=Gallus gallus GN=TAPT1 PE=2 SV=2	sp|Q5ZLG8|TAPT1_CHICK	0.65	0.6
Lamin-A OS=Gallus gallus GN=LMNA PE=2 SV=1	sp|P13648|LMNA_CHICK	0.66	0.9
Tubulin alpha-5 chain OS=Gallus gallus PE=3 SV=1	Tubulin alpha-5 chainOS=Gallus gallus PE=3 SV=1	0.66	0.8
Coatomer subunit beta OS=Gallus gallus GN=COPB1 PE=2 SV=1	Coatomer subunit betaOS=Gallus gallus GN=COPB1 PE=2 SV=1	0.66	0.9
Sodium/potassium-transporting ATPase subunit beta-1 OS=Gallus gallus GN=ATP1B1 PE=1 SV=1	sp|P08251|AT1B1_CHICK	0.66	0.8
Tubulin beta-3 chain OS=Gallus gallus PE=2 SV=1	sp|P09206|TBB3_CHICK	0.66	0.9
Interferon regulatory factor 3 OS=Gallus gallus GN=IRF3 PE=2 SV=1	Interferon regulatoryfactor 3 OS=Gallus gallus GN=IRF3 PE=2 SV=1	0.66	1.4
Macrophage migration inhibitory factor OS=Gallus gallus GN=MIF PE=3 SV=3	sp|Q02960|MIF_CHICK	0.67	1.2
40S ribosomal protein S12 OS=Gallus gallus GN=RPS12 PE=1 SV=2	40S ribosomal proteinS12 OS=Gallus gallus GN=RPS12 PE=1 SV=2	0.67	0.9
Cytosolic purine 5'-nucleotidase OS=Gallus gallus GN=NT5C2 PE=2 SV=1	sp|Q5ZIZ4|5NTC_CHICK	0.67	0.7
Raftlin OS=Gallus gallus GN=RFTN1 PE=2 SV=3	sp|Q7SZI5|RFTN1_CHICK	0.67	0.7
Histone H5 OS=Gallus gallus PE=1 SV=2	sp|P02259|H5_CHICK	0.67	1.5
Gelsolin OS=Gallus gallus GN=GSN PE=2 SV=1	sp|O93510|GELS_CHICK	0.68	0.9
Fructose-bisphosphate aldolase C (Fragment) OS=Gallus gallus GN=ALDOC PE=2 SV=1	Fructose-bisphosphatealdolase C (Fragment) OS=Gallus gallus GN=ALDOC PE=2 SV=1	0.68	1.2
Myosin regulatory light chain 2, smooth muscle minor isoform OS=Gallus gallus PE=2 SV=2	sp|P24032|MLRN_CHICK	0.68	1.1
Phosphoglycerate mutase 1 OS=Gallus gallus GN=PGAM1 PE=1 SV=3	sp|Q5ZLN1|PGAM1_CHICK	0.68	0.9
Protein phosphatase 1 regulatory subunit 12A OS=Gallus gallus GN=PPP1R12A PE=1 SV=1	Protein phosphatase 1regulatory subunit 12A OS=Gallus gallus GN=PPP1R12A PE=1 SV=1	0.68	1.1
T-complex protein 1 subunit theta OS=Gallus gallus GN=CCT8 PE=1 SV=3	sp|Q6EE31|TCPQ_CHICK	0.68	0.8
Prohibitin-2 OS=Gallus gallus GN=PHB2 PE=2 SV=1	sp|Q5ZMN3|PHB2_CHICK	0.68	1.2
Sulfite oxidase OS=Gallus gallus GN=SUOX PE=1 SV=3	sp|P07850|SUOX_CHICK	0.68	1.5
Replication protein A 70 kDa DNA-binding subunit OS=Gallus gallus GN=RPA1 PE=2 SV=1	Replication protein A70 kDa DNA-binding subunit OS=Gallus gallus GN=RPA1 PE=2 SV=1	0.68	0.9
Serine/threonine-protein kinase 4 OS=Gallus gallus GN=STK4 PE=2 SV=1	sp|Q5ZJK4|STK4_CHICK	0.68	0.7
Kinectin OS=Gallus gallus GN=KTN1 PE=1 SV=1	sp|Q90631|KTN1_CHICK	0.69	0.9
Integrin beta-1 OS=Gallus gallus GN=ITGB1 PE=1 SV=1	sp|P07228|ITB1_CHICK	0.69	1.1
Prohibitin OS=Gallus gallus GN=PHB PE=1 SV=1	sp|P84173|PHB_CHICK	0.69	1.2
60S ribosomal protein L7a OS=Gallus gallus GN=RPL7A PE=2 SV=2	60S ribosomal proteinL7a OS=Gallus gallus GN=RPL7A PE=2 SV=2	0.69	0.9
Eukaryotic translation initiation factor 3 subunit L OS=Gallus gallus GN=EIF3L PE=2 SV=1	sp|Q5F428|EIF3L_CHICK	0.69	1.1
Eukaryotic translation initiation factor 3 subunit E OS=Gallus gallus GN=EIF3E PE=2 SV=1	sp|Q5ZLA5|EIF3E_CHICK	0.69	0.8
Integrin alpha-V OS=Gallus gallus GN=ITGAV PE=2 SV=1	sp|P26008|ITAV_CHICK	0.69	0.8
Tenascin OS=Gallus gallus GN=TNC PE=1 SV=2	sp|P10039|TENA_CHICK	0.7	0.9
Src substrate protein p85 OS=Gallus gallus GN=CTTN1 PE=1 SV=1	Src substrate proteinp85 OS=Gallus gallus GN=CTTN1 PE=1 SV=1 (+1)	0.7	1.1
GTP-binding nuclear protein Ran OS=Gallus gallus GN=RAN PE=2 SV=1	sp|P42558|RAN_CHICK	0.7	0.8
Ubiquitin carboxyl-terminal hydrolase 7 OS=Gallus gallus GN=USP7 PE=2 SV=1	sp|Q6U7I1|UBP7_CHICK	0.7	0.7
Transferrin receptor protein 1 OS=Gallus gallus GN=TFRC PE=2 SV=2	sp|Q90997|TFR1_CHICK	0.7	0.8
Keratin, type I cytoskeletal 19 OS=Gallus gallus GN=KRT19 PE=2 SV=1	sp|O93256|K1C19_CHICK	0.7	1.6
Ig lambda chain C region OS=Gallus gallus PE=4 SV=1	sp|P20763|LAC_CHICK	0.7	0.7
Acyl-CoA-binding domain-containing protein 5 OS=Gallus gallus GN=ACBD5 PE=2 SV=1	sp|Q5ZHQ6|ACBD5_CHICK	0.7	1.3
Neuropilin-1 OS=Gallus gallus GN=NRP1 PE=2 SV=1	sp|P79795|NRP1_CHICK	0.7	0.6
Deoxyhypusine hydroxylase OS=Gallus gallus GN=DOHH PE=2 SV=1	sp|Q5ZIP3|DOHH_CHICK	0.7	0.5
Transcriptional coactivator YAP1 OS=Gallus gallus GN=YAP1 PE=1 SV=1	sp|P46936|YAP1_CHICK	0.7	0.7
Dihydropyrimidinase-related protein 2 OS=Gallus gallus GN=DPYSL2 PE=2 SV=1	sp|Q90635|DPYL2_CHICK	0.71	0.9
Heterogeneous nuclear ribonucleoprotein K OS=Gallus gallus GN=HNRNPK PE=2 SV=1	Heterogeneous nuclearribonucleoprotein K OS=Gallus gallus GN=HNRNPK PE=2 SV=1	0.71	0.9
F-actin-capping protein subunit alpha-2 OS=Gallus gallus GN=CAPZA2 PE=1 SV=1	sp|P28497|CAZA2_CHICK	0.71	0.9
Bifunctional purine biosynthesis protein PURH OS=Gallus gallus GN=ATIC PE=1 SV=1	Bifunctional purine biosynthesis protein PURH OS=Gallus gallus GN=ATIC PE=1 SV=1	0.71	0.9
Probable ATP-dependent RNA helicase DDX6 OS=Gallus gallus GN=DDX6 PE=2 SV=1	sp|Q5ZKB9|DDX6_CHICK	0.71	1.1
Heat shock cognate protein HSP 90-beta OS=Gallus gallus GN=HSP90AB1 PE=2 SV=1	sp|Q04619|HS90B_CHICK	0.71	0.8
Lysozyme g OS=Gallus gallus PE=2 SV=1	sp|P27042|LYG_CHICK	0.71	1.7
Integrator complex subunit 7 OS=Gallus gallus GN=INTS7 PE=2 SV=1	sp|Q5ZL91|INT7_CHICK	0.71	0.7
Myosin-9 OS=Gallus gallus GN=MYH9 PE=2 SV=1	sp|P14105|MYH9_CHICK	0.72	1
Hemoglobin subunit beta OS=Gallus gallus GN=HBB PE=1 SV=2	sp|P02112|HBB_CHICK	0.72	1.1
Alpha-actinin-4 OS=Gallus gallus GN=ACTN4 PE=1 SV=1	sp|Q90734|ACTN4_CHICK	0.72	1.1
Peptidyl-prolyl cis-trans isomerase B OS=Gallus gallus GN=PPIB PE=2 SV=1	sp|P24367|PPIB_CHICK	0.72	1.2
Dynactin subunit 1 OS=Gallus gallus GN=DCTN1 PE=1 SV=2	sp|P35458|DCTN1_CHICK	0.72	0.9
TAR DNA-binding protein 43 OS=Gallus gallus GN=TARDBP PE=2 SV=1	sp|Q5ZLN5|TADBP_CHICK	0.72	0.9
Casein kinase II subunit alpha OS=Gallus gallus GN=CSNK2A1 PE=2 SV=1	sp|P21868|CSK21_CHICK	0.72	1.3
Malignant T-cell-amplified sequence 1 OS=Gallus gallus GN=MCTS1 PE=2 SV=1	sp|Q5ZI42|MCTS1_CHICK	0.72	0.7
Translin OS=Gallus gallus GN=TSN PE=1 SV=1	sp|P79769|TSN_CHICK	0.72	0.8
Histone H4 type VIII OS=Gallus gallus GN=H4-VIII PE=3 SV=3	sp|P70081|H48_CHICK (+1)	0.73	1.1
Transcription elongation factor SPT5 OS=Gallus gallus GN=SUPT5H PE=2 SV=1	sp|Q5ZI08|SPT5H_CHICK	0.73	0.8
COP9 signalosome complex subunit 3 OS=Gallus gallus GN=COPS3 PE=2 SV=1	sp|Q5ZJF1|CSN3_CHICK	0.73	0.9
Tubulin-specific chaperone D OS=Gallus gallus GN=TBCD PE=2 SV=1	sp|Q5ZI87|TBCD_CHICK	0.73	0.7
Eukaryotic initiation factor 4A-II OS=Gallus gallus GN=EIF4A2 PE=2 SV=1	Eukaryotic initiationfactor 4A-II OS=Gallus gallus GN=EIF4A2 PE=2 SV=1	0.74	0.9
Radixin OS=Gallus gallus GN=RDX PE=2 SV=1	sp|Q9PU45|RADI_CHICK	0.74	1.1
Serine-threonine kinase receptor-associated protein OS=Gallus gallus GN=STRAP PE=2 SV=2	Serine-threonine kinase receptor-associated protein OS=Gallus gallus GN=STRAP PE=2 SV=2	0.74	0.9
Actin, gamma-enteric smooth muscle OS=Gallus gallus GN=ACTG2 PE=1 SV=1	sp|P63270|ACTH_CHICK	0.74	1.2
Casein kinase I isoform alpha OS=Gallus gallus GN=CSNK1A1 PE=2 SV=1	sp|P67962|KC1A_CHICK (+2)	0.74	0.6
Tubulin beta-7 chain OS=Gallus gallus PE=2 SV=1	sp|P09244|TBB7_CHICK	0.75	0.9
Elongation factor 2 OS=Gallus gallus GN=EEF2 PE=1 SV=3	sp|Q90705|EF2_CHICK	0.75	0.9
Cytochrome c oxidase subunit 2 OS=Gallus gallus GN=MT-CO2 PE=3 SV=1	sp|P18944|COX2_CHICK	0.75	1.2
Argininosuccinate synthase OS=Gallus gallus GN=ASS1 PE=2 SV=1	sp|Q5ZJ23|ASSY_CHICK	0.75	1.1
Pre-mRNA-processing factor 19 OS=Gallus gallus GN=PRPF19 PE=1 SV=1	sp|Q5ZMA2|PRP19_CHICK	0.75	0.9
Integrin alpha-6 OS=Gallus gallus GN=ITGA6 PE=2 SV=1	sp|P26007|ITA6_CHICK	0.75	0.8
Putative oxidoreductase GLYR1 OS=Gallus gallus GN=GLYR1 PE=2 SV=1	sp|Q5ZLS7|GLYR1_CHICK	0.75	0.7
Tubulin-specific chaperone A OS=Gallus gallus GN=TBCA PE=1 SV=2	sp|P80585|TBCA_CHICK	0.75	0.6
Ras-related protein Rab-10 OS=Gallus gallus GN=RAB10 PE=2 SV=1	sp|Q5ZIT5|RAB10_CHICK	0.76	1.1
Acidic leucine-rich nuclear phosphoprotein 32 family member E OS=Gallus gallus GN=ANP32E PE=2 SV=1	sp|Q5F4A3|AN32E_CHICK	0.76	1.1
Isoform Ba-CK of Creatine kinase B-type OS=Gallus gallus GN=CKB	sp|P05122-2|KCRB_CHICK	0.76	0.9
DnaJ homolog subfamily C member 3 OS=Gallus gallus GN=DNAJC3 PE=2 SV=1	sp|Q5ZI13|DNJC3_CHICK	0.76	1.2
Anamorsin OS=Gallus gallus GN=CIAPIN1 PE=2 SV=1	sp|Q5ZJA2|CPIN1_CHICK	0.76	1.1
Cytosolic phospholipase A2 OS=Gallus gallus GN=PLA2G4A PE=1 SV=1	sp|P49147|PA24A_CHICK	0.76	0.7
40S ribosomal protein SA OS=Gallus gallus GN=RPSA PE=3 SV=1	40S ribosomal proteinSA OS=Gallus gallus GN=RPSA PE=3 SV=1	0.77	1.1
Histone H1.11R OS=Gallus gallus PE=3 SV=2	sp|P08288|H11R_CHICK	0.77	0.8
Adipocyte plasma membrane-associated protein OS=Gallus gallus GN=APMAP PE=2 SV=1	Adipocyte plasma membrane-associated protein OS=Gallus gallus GN=APMAP PE=2 SV=1	0.77	1.1
Phosphoribosyl pyrophosphate synthase-associated protein 2 OS=Gallus gallus GN=PRPSAP2 PE=2 SV=1	Phosphoribosyl pyrophosphate synthase-associated protein 2 OS=Gallus gallus GN=PRPSAP2 PE=2 SV=1	0.77	1.1
Serine/threonine-protein kinase 10 OS=Gallus gallus GN=STK10 PE=3 SV=2	sp|F1NBT0|STK10_CHICK	0.77	0.8
Heat shock protein beta-1 OS=Gallus gallus GN=HSPB1 PE=2 SV=1	sp|Q00649|HSPB1_CHICK	0.78	0.9
Ovotransferrin OS=Gallus gallus PE=1 SV=2	sp|P02789|TRFE_CHICK	0.78	0.9
Histone-binding protein RBBP4 OS=Gallus gallus GN=RBBP4 PE=1 SV=3	sp|Q9W7I5|RBBP4_CHICK	0.78	0.9
Dystrophin OS=Gallus gallus GN=DMD PE=2 SV=1-DECOY	Dystrophin OS=Gallus gallus GN=DMD PE=2 SV=1-DECOY	0.78	1.1
Ras-related protein Rab-6A OS=Gallus gallus GN=RAB6A PE=2 SV=3	sp|Q1KME6|RAB6A_CHICK	0.78	0.8
Dehydrogenase/reductase SDR family member 11 OS=Gallus gallus GN=DHRS11 PE=2 SV=1	sp|Q71R50|DHR11_CHICK	0.78	1.3
Aminomethyltransferase, mitochondrial OS=Gallus gallus GN=AMT PE=1 SV=2	sp|P28337|GCST_CHICK	0.78	0.8
Glucose-induced degradation protein 8 homolog OS=Gallus gallus GN=GID8 PE=2 SV=1	sp|Q5ZKQ7|GID8_CHICK	0.78	1.4
Protein disulfide-isomerase OS=Gallus gallus GN=P4HB PE=1 SV=3	sp|P09102|PDIA1_CHICK	0.79	1
Succinate dehydrogenase [ubiquinone] flavoprotein subunit, mitochondrial OS=Gallus gallus GN=SDHA PE=1 SV=2	Succinate dehydrogenase [ubiquinone] flavoprotein subunit, mitochondrial OS=Gallus gallus GN=SDHA PE=1 SV=2	0.79	1.1
Nucleoside diphosphate kinase OS=Gallus gallus PE=2 SV=1	sp|O57535|NDK_CHICK	0.79	0.9
Collagen alpha-1(III) chain (Fragments) OS=Gallus gallus GN=COL3A1 PE=2 SV=2	Collagen alpha-1(III)chain (Fragments) OS=Gallus gallus GN=COL3A1 PE=2 SV=2	0.79	1.1
Endophilin-B1 OS=Gallus gallus GN=SH3GLB1 PE=2 SV=1	sp|Q5ZIR1|SHLB1_CHICK	0.79	0.9
V(D)J recombination-activating protein 1 OS=Gallus gallus GN=RAG1 PE=3 SV=1-DECOY	V(D)J recombination-activating protein 1 OS=Gallus gallus GN=RAG1 PE=3 SV=1-DECOY	0.79	1.3
Myosin light polypeptide 6 OS=Gallus gallus GN=MYL6 PE=1 SV=3	sp|P02607|MYL6_CHICK	0.8	0.9
Nucleolin OS=Gallus gallus GN=NCL PE=1 SV=1	sp|P15771|NUCL_CHICK	0.8	0.9
Trypsin II-P29 OS=Gallus gallus PE=2 SV=1	sp|Q90629|TRY3_CHICK	0.8	1.1
CD166 antigen OS=Gallus gallus GN=ALCAM PE=1 SV=1	sp|P42292|CD166_CHICK	0.8	0.8
Platelet-activating factor acetylhydrolase IB subunit beta OS=Gallus gallus GN=PAFAH1B2 PE=2 SV=1	sp|Q5ZMS2|PA1B2_CHICK	0.8	0.8
Insulin-like growth factor 2 mRNA-binding protein 1 OS=Gallus gallus GN=IGF2BP1 PE=1 SV=1	Insulin-like growth factor 2 mRNA-binding protein 1 OS=Gallus gallus GN=IGF2BP1 PE=1 SV=1	0.8	1.4
Vinculin OS=Gallus gallus GN=VCL PE=1 SV=4	sp|P12003|VINC_CHICK	0.81	1
Adseverin OS=Gallus gallus GN=SCIN PE=2 SV=2	sp|Q5ZIV9|ADSV_CHICK	0.81	1
T-complex protein 1 subunit eta OS=Gallus gallus GN=CCT7 PE=1 SV=1	sp|Q5ZJK8|TCPH_CHICK	0.81	0.9
V-type proton ATPase catalytic subunit A OS=Gallus gallus GN=ATP6V1A PE=2 SV=1	sp|Q90647|VATA_CHICK	0.81	0.9
Retinal dehydrogenase 1 OS=Gallus gallus GN=ALDH1A1 PE=2 SV=1	Retinal dehydrogenase1 OS=Gallus gallus GN=ALDH1A1 PE=2 SV=1	0.81	0.9
Cysteine--tRNA ligase, cytoplasmic OS=Gallus gallus GN=CARS PE=2 SV=1	sp|Q5F408|SYCC_CHICK	0.81	0.9
Actin, alpha skeletal muscle OS=Gallus gallus GN=ACTA1 PE=1 SV=1	Actin, alpha skeletalmuscle OS=Gallus gallus GN=ACTA1 PE=1 SV=1	0.81	0.7
Hippocalcin-like protein 1 OS=Gallus gallus GN=HPCAL1 PE=1 SV=2	sp|P42324|HPCL1_CHICK	0.81	0.8
60S ribosomal protein L36 OS=Gallus gallus GN=RPL36 PE=3 SV=1	60S ribosomal proteinL36 OS=Gallus gallus GN=RPL36 PE=3 SV=1	0.81	1.2
Spectrin alpha chain, non-erythrocytic 1 OS=Gallus gallus GN=SPTAN1 PE=1 SV=3	Spectrin alpha chain,non-erythrocytic 1 OS=Gallus gallus GN=SPTAN1 PE=1 SV=3	0.82	1
NSFL1 cofactor p47 OS=Gallus gallus GN=NSFL1C PE=2 SV=1	sp|Q5ZK10|NSF1C_CHICK	0.82	1.1
Isoform 2 of Hydroxyacylglutathione hydrolase, mitochondrial OS=Gallus gallus GN=HAGH	sp|Q5ZI23-2|GLO2_CHICK (+1)	0.82	0.9
Paraspeckle component 1 OS=Gallus gallus GN=PSPC1 PE=2 SV=1	Paraspeckle component1 OS=Gallus gallus GN=PSPC1 PE=2 SV=1	0.82	1.1
Ras-related protein Rab-11A OS=Gallus gallus GN=RAB11A PE=2 SV=1	sp|Q5ZJN2|RB11A_CHICK	0.82	1.1
Endophilin-A2 OS=Gallus gallus GN=SH3GL1 PE=1 SV=1	sp|Q8AXV0|SH3G1_CHICK	0.82	0.9
Activated RNA polymerase II transcriptional coactivator p15 OS=Gallus gallus GN=SUB1 PE=2 SV=1	sp|Q5ZK63|TCP4_CHICK	0.82	0.9
Collagen alpha-2(VI) chain OS=Gallus gallus GN=COL6A2 PE=2 SV=1	sp|P15988|CO6A2_CHICK	0.83	1.1
Protein S100-A6 OS=Gallus gallus GN=S100A6 PE=3 SV=1	sp|Q98953|S10A6_CHICK	0.83	0.8
Glyceraldehyde-3-phosphate dehydrogenase OS=Gallus gallus GN=GAPDH PE=2 SV=3	sp|P00356|G3P_CHICK	0.84	1.1
L-lactate dehydrogenase B chain OS=Gallus gallus GN=LDHB PE=1 SV=3	sp|P00337|LDHB_CHICK	0.84	1
Alcohol dehydrogenase [NADP(+)] OS=Gallus gallus GN=AKR1A1 PE=2 SV=1	Alcohol dehydrogenase[NADP(+)] OS=Gallus gallus GN=AKR1A1 PE=2 SV=1	0.84	1
Histone-lysine N-methyltransferase setd3 OS=Gallus gallus GN=SETD3 PE=2 SV=1	sp|Q5ZML9|SETD3_CHICK	0.84	0.9
Cathelicidin-2 OS=Gallus gallus GN=CATHL2 PE=2 SV=1	sp|Q2IAL7|CTHL2_CHICK	0.84	1.3
Hypoxia up-regulated protein 1 OS=Gallus gallus GN=HYOU1 PE=2 SV=1	sp|Q5ZLK7|HYOU1_CHICK	0.85	1
Tubulin beta-2 chain OS=Gallus gallus PE=1 SV=1	sp|P32882|TBB2_CHICK	0.85	0.9
Cytochrome P450 2H1 OS=Gallus gallus GN=CYP2H1 PE=2 SV=1	sp|P05180|CP2H1_CHICK	0.85	0.9
Phenylalanine--tRNA ligase alpha subunit OS=Gallus gallus GN=FARSA PE=1 SV=1	sp|Q5ZJQ2|SYFA_CHICK	0.85	0.9
Mitochondrial proton/calcium exchanger protein OS=Gallus gallus GN=LETM1 PE=2 SV=1	sp|Q5ZK33|LETM1_CHICK	0.85	1.1
Leucine-rich repeat-containing protein 59 OS=Gallus gallus GN=LRRC59 PE=2 SV=1	sp|Q5F334|LRC59_CHICK	0.85	0.9
Serum paraoxonase/arylesterase 2 OS=Gallus gallus GN=PON2 PE=2 SV=1	sp|Q90952|PON2_CHICK	0.85	0.9
Structural maintenance of chromosomes protein 2 OS=Gallus gallus GN=SMC2 PE=2 SV=1	sp|Q90988|SMC2_CHICK	0.85	0.9
DNA mismatch repair protein Msh6 OS=Gallus gallus GN=MSH6 PE=3 SV=2	sp|E1BYJ2|MSH6_CHICK	0.85	1.3
Band 3 anion transport protein OS=Gallus gallus GN=SLC4A1 PE=2 SV=1	sp|P15575|B3AT_CHICK	0.85	1.3
Myosin-1B OS=Gallus gallus GN=MYH1B PE=2 SV=3	sp|P02565|MYH1B_CHICK	0.85	1.3
Trafficking protein particle complex subunit 3 OS=Gallus gallus GN=TRAPPC3 PE=2 SV=1	sp|Q5ZI57|TPPC3_CHICK	0.85	1.3
Myosin-11 OS=Gallus gallus GN=MYH11 PE=1 SV=4	sp|P10587|MYH11_CHICK	0.86	1
Destrin OS=Gallus gallus GN=DSTN PE=1 SV=3	sp|P18359|DEST_CHICK	0.86	1.1
55 kDa erythrocyte membrane protein OS=Gallus gallus GN=MPP1 PE=2 SV=1	sp|Q5ZJ00|EM55_CHICK	0.86	1.1
Ovoinhibitor OS=Gallus gallus GN=OIH PE=1 SV=2	sp|P10184|IOV7_CHICK	0.86	0.9
Serine/arginine-rich splicing factor 1 OS=Gallus gallus GN=SRSF1 PE=1 SV=3	sp|Q5ZML3|SRSF1_CHICK	0.86	1.1
Charged multivesicular body protein 4b OS=Gallus gallus GN=CHMP4B PE=2 SV=1	sp|Q5ZHP5|CHM4B_CHICK	0.86	1
Ubiquitin-like modifier-activating enzyme 5 OS=Gallus gallus GN=UBA5 PE=2 SV=1	sp|Q6IVA4|UBA5_CHICK	0.86	1.2
Focal adhesion kinase 1 OS=Gallus gallus GN=PTK2 PE=1 SV=2	Focal adhesion kinase1 OS=Gallus gallus GN=PTK2 PE=1 SV=2	0.86	1.2
Vimentin OS=Gallus gallus GN=VIM PE=3 SV=2	sp|P09654|VIME_CHICK	0.87	1
Elongation factor Tu, mitochondrial (Fragment) OS=Gallus gallus GN=TUFM PE=1 SV=1	Elongation factor Tu,mitochondrial (Fragment) OS=Gallus gallus GN=TUFM PE=1 SV=1	0.87	0.9
PDZ and LIM domain protein 3 OS=Gallus gallus GN=PDLIM3 PE=1 SV=1	sp|Q9PU47|PDLI3_CHICK	0.87	1
Fibrinogen-like protein 1-like protein OS=Gallus gallus PE=1 SV=2	sp|O93526|FGL1L_CHICK	0.87	1
Isoform 9 of Calcium-activated potassium channel subunit alpha-1 OS=Gallus gallus GN=KCNMA1	sp|Q8AYS8-9|KCMA1_CHICK (+7)	0.87	0.8
G protein-activated inward rectifier potassium channel 1 OS=Gallus gallus GN=KCNJ3 PE=2 SV=1-DECOY	G protein-activated inward rectifier potassium channel 1 OS=Gallus gallus GN=KCNJ3 PE=2 SV=1-DECOY	0.87	1.3
Histone H2B 8 OS=Gallus gallus GN=H2B-VIII PE=1 SV=3	sp|Q9PSW9|H2B8_CHICK (+2)	0.88	0.9
V-type proton ATPase subunit B OS=Gallus gallus GN=ATP6V1B PE=3 SV=1	sp|P49712|VATB_CHICK	0.88	0.9
DNA damage-binding protein 1 OS=Gallus gallus GN=DDB1 PE=1 SV=1	sp|Q805F9|DDB1_CHICK	0.88	0.9
FACT complex subunit SSRP1 OS=Gallus gallus GN=SSRP1 PE=2 SV=2	sp|Q04678|SSRP1_CHICK	0.88	0.9
BH3-interacting domain death agonist OS=Gallus gallus GN=BID PE=2 SV=2	sp|Q8JGM8|BID_CHICK	0.88	0.9
3-hydroxyisobutyryl-CoA hydrolase, mitochondrial OS=Gallus gallus GN=HIBCH PE=2 SV=1	sp|Q5ZJ60|HIBCH_CHICK	0.88	0.9
Major vault protein OS=Gallus gallus GN=MVP PE=2 SV=1	sp|Q5ZMI4|MVP_CHICK	0.89	1
Superoxide dismutase [Cu-Zn] OS=Gallus gallus GN=SOD1 PE=1 SV=3	sp|P80566|SODC_CHICK	0.89	1.1
Glutathione S-transferase 2 OS=Gallus gallus GN=GSTM2 PE=1 SV=4	sp|P20136|GSTM2_CHICK	0.89	1
F-actin-capping protein subunit alpha-1 OS=Gallus gallus GN=CAPZA1 PE=1 SV=1	sp|P13127|CAZA1_CHICK	0.89	1
Tubulin beta-4 chain OS=Gallus gallus PE=1 SV=1	sp|P09652|TBB4_CHICK	0.89	1.1
Obg-like ATPase 1 OS=Gallus gallus GN=OLA1 PE=2 SV=1	sp|Q5ZM25|OLA1_CHICK	0.9	1
Hematopoietic prostaglandin D synthase OS=Gallus gallus GN=HPGDS PE=1 SV=3	sp|O73888|HPGDS_CHICK	0.9	0.9
Lissencephaly-1 homolog OS=Gallus gallus GN=PAFAH1B1 PE=2 SV=3	sp|Q9PTR5|LIS1_CHICK	0.9	1
DNA topoisomerase 2-beta OS=Gallus gallus GN=TOP2B PE=2 SV=1	sp|O42131|TOP2B_CHICK	0.9	1.1
Ras-related protein Rab-5B OS=Gallus gallus GN=RAB5B PE=2 SV=1	sp|Q5ZHW4|RAB5B_CHICK	0.91	0.9
Phosphoglycerate kinase OS=Gallus gallus GN=PGK PE=2 SV=2	sp|P51903|PGK_CHICK	0.92	1
ADP-ribosylation factor 5 OS=Gallus gallus GN=ARF5 PE=2 SV=2	sp|P49702|ARF5_CHICK	0.92	1
Eukaryotic translation initiation factor 2 subunit 3 OS=Gallus gallus GN=EIF2S3 PE=1 SV=1	Eukaryotic translation initiation factor 2 subunit 3 OS=Gallus gallus GN=EIF2S3 PE=1 SV=1	0.92	1
Myeloid protein 1 OS=Gallus gallus GN=MIM1 PE=1 SV=2	sp|P08940|MIM1_CHICK	0.92	1.1
Eukaryotic translation initiation factor 3 subunit M OS=Gallus gallus GN=EIF3M PE=2 SV=1	sp|Q5ZJ64|EIF3M_CHICK	0.92	1
PRA1 family protein 3 OS=Gallus gallus GN=ARL6IP5 PE=2 SV=1	PRA1 family protein 3OS=Gallus gallus GN=ARL6IP5 PE=2 SV=1	0.92	1.1
Heterochromatin protein 1-binding protein 3 OS=Gallus gallus GN=HP1BP3 PE=2 SV=1	Heterochromatin protein 1-binding protein 3 OS=Gallus gallus GN=HP1BP3 PE=2 SV=1	0.92	1.1
Ferritin heavy chain OS=Gallus gallus GN=FTH PE=2 SV=2	sp|P08267|FRIH_CHICK	0.92	1
LDLR chaperone MESD OS=Gallus gallus GN=MESDC2 PE=2 SV=2	sp|Q5ZKK4|MESD_CHICK	0.92	1.1
Dynamin-like 120 kDa protein, mitochondrial OS=Gallus gallus GN=OPA1 PE=2 SV=1	sp|Q5F499|OPA1_CHICK	0.92	0.9
78 kDa glucose-regulated protein OS=Gallus gallus GN=HSPA5 PE=1 SV=1	sp|Q90593|GRP78_CHICK	0.93	1
Cleavage and polyadenylation specificity factor subunit 6 OS=Gallus gallus GN=CPSF6 PE=2 SV=1	Cleavage and polyadenylation specificity factor subunit 6 OS=Gallus gallus GN=CPSF6 PE=2 SV=1	0.93	1
Stimulator of interferon genes protein OS=Gallus gallus GN=TMEM173 PE=3 SV=1	sp|E1C7U0|STING_CHICK	0.93	1
Drebrin OS=Gallus gallus GN=DBN1 PE=2 SV=4	sp|P18302|DREB_CHICK (+1)	0.93	1.1
AP-2 complex subunit mu OS=Gallus gallus GN=AP2M1 PE=2 SV=1	sp|Q5ZMP6|AP2M1_CHICK	0.93	0.9
Alpha-enolase OS=Gallus gallus GN=ENO1 PE=2 SV=2	sp|P51913|ENOA_CHICK	0.94	1
D-beta-hydroxybutyrate dehydrogenase, mitochondrial OS=Gallus gallus GN=BDH1 PE=2 SV=1	D-beta-hydroxybutyrate dehydrogenase, mitochondrial OS=Gallus gallus GN=BDH1 PE=2 SV=1	0.94	1
Aspartate aminotransferase, cytoplasmic OS=Gallus gallus GN=GOT1 PE=1 SV=3	sp|P00504|AATC_CHICK	0.94	1
Cysteine and glycine-rich protein 2 OS=Gallus gallus GN=CSRP2 PE=2 SV=3	sp|P50460|CSRP2_CHICK	0.94	1
Thiosulfate sulfurtransferase OS=Gallus gallus GN=TST PE=1 SV=1	sp|P25324|THTR_CHICK	0.94	1.1
Elongation factor 1-alpha 1 OS=Gallus gallus GN=EEF1A PE=2 SV=1	sp|Q90835|EF1A_CHICK	0.95	1
Isoform 2 of Sarcoplasmic/endoplasmic reticulum calcium ATPase 2 OS=Gallus gallus GN=ATP2A2	Isoform 2 of Sarcoplasmic/endoplasmic reticulum calcium ATPase 2 OS=Gallus gallus GN=ATP2A2 (+1)	0.95	1
UMP-CMP kinase OS=Gallus gallus GN=CMPK PE=2 SV=1	sp|Q5ZKE7|KCY_CHICK	0.95	1
Cytochrome P450 2H2 OS=Gallus gallus GN=CYP2H2 PE=1 SV=1	sp|P20678|CP2H2_CHICK	0.95	1
Transcription factor BTF3 homolog 4 OS=Gallus gallus GN=BTF3L4 PE=2 SV=1	sp|Q5ZJG3|BT3L4_CHICK	0.95	0.9
Ras-related protein Rab-2A OS=Gallus gallus GN=RAB2A PE=2 SV=1	sp|Q90965|RAB2A_CHICK	0.96	1
Deoxynucleoside triphosphate triphosphohydrolase SAMHD1 OS=Gallus gallus GN=SAMHD1 PE=2 SV=1	Deoxynucleoside triphosphate triphosphohydrolase SAMHD1 OS=Gallus gallus GN=SAMHD1 PE=2 SV=1	0.96	1
Inositol-tetrakisphosphate 1-kinase OS=Gallus gallus GN=ITPK1 PE=2 SV=1	sp|Q5F480|ITPK1_CHICK	0.96	1.1
Mini-chromosome maintenance complex-binding protein OS=Gallus gallus GN=MCMBP PE=2 SV=2	Mini-chromosome maintenance complex-binding protein OS=Gallus gallus GN=MCMBP PE=2 SV=2	0.96	1.1
Beta-2-microglobulin OS=Gallus gallus GN=B2M PE=1 SV=3	sp|P21611|B2MG_CHICK	0.97	1
Eukaryotic translation initiation factor 3 subunit J OS=Gallus gallus GN=EIF3J PE=2 SV=1	Eukaryotic translation initiation factor 3 subunit J OS=Gallus gallus GN=EIF3J PE=2 SV=1	0.97	1
Eukaryotic initiation factor 4A-III OS=Gallus gallus GN=EIF4A3 PE=2 SV=1	Eukaryotic initiationfactor 4A-III OS=Gallus gallus GN=EIF4A3 PE=2 SV=1	0.97	1
Protein CDV3 homolog OS=Gallus gallus GN=CDV3 PE=2 SV=1	sp|Q5ZLH9|CDV3_CHICK	0.97	1
60S ribosomal protein L27 OS=Gallus gallus GN=RPL27 PE=2 SV=2	60S ribosomal proteinL27 OS=Gallus gallus GN=RPL27 PE=2 SV=2	0.97	1
Protein mago nashi homolog OS=Gallus gallus GN=MAGOH PE=2 SV=2	sp|P50594|MGN_CHICK	0.97	0.9
Serine/threonine-protein phosphatase 6 regulatory subunit 3 OS=Gallus gallus GN=PPP6R3 PE=2 SV=1	sp|Q5F471|PP6R3_CHICK	0.97	1.1
Tubulin beta-5 chain OS=Gallus gallus PE=3 SV=1	sp|P09653|TBB5_CHICK	0.98	1
Annexin A5 OS=Gallus gallus GN=ANXA5 PE=1 SV=2	sp|P17153|ANXA5_CHICK	0.98	1
Prostaglandin E synthase 3 (Fragment) OS=Gallus gallus GN=PTGES3 PE=1 SV=1	sp|Q90955|TEBP_CHICK	0.98	1
Glutathione S-transferase OS=Gallus gallus PE=2 SV=2	sp|Q08393|GSTA2_CHICK	0.98	1
Charged multivesicular body protein 2a OS=Gallus gallus GN=CHMP2A PE=2 SV=1	sp|Q5ZHN1|CHM2A_CHICK	0.98	1
Protein PRRC1 OS=Gallus gallus GN=PRRC1 PE=2 SV=2	sp|Q5F3I0|PRRC1_CHICK	0.98	1
Transcription factor Sp3 OS=Gallus gallus GN=SP3 PE=1 SV=1	sp|Q90WR8|SP3_CHICK	0.98	1
Exportin-4 OS=Gallus gallus GN=XPO4 PE=2 SV=1	sp|Q5ZMR9|XPO4_CHICK	0.98	1
Calponin-1 OS=Gallus gallus GN=CNN1 PE=1 SV=2	sp|P26932|CNN1_CHICK	0.99	1
Malate dehydrogenase, cytoplasmic OS=Gallus gallus GN=MDH1 PE=2 SV=1	Malate dehydrogenase,cytoplasmic OS=Gallus gallus GN=MDH1 PE=2 SV=1	0.99	1
Fatty acid synthase OS=Gallus gallus GN=FASN PE=1 SV=5	sp|P12276|FAS_CHICK (+1)	0.99	1
Basigin OS=Gallus gallus GN=BSG PE=1 SV=2	sp|P17790|BASI_CHICK (+1)	0.99	1
RRP12-like protein OS=Gallus gallus GN=RRP12 PE=2 SV=1	sp|Q5ZKD5|RRP12_CHICK	0.99	1
Trifunctional purine biosynthetic protein adenosine-3 OS=Gallus gallus GN=GART PE=2 SV=1	sp|P21872|PUR2_CHICK	1	1
AP-3 complex subunit mu-1 OS=Gallus gallus GN=AP3M1 PE=2 SV=1	sp|Q5ZMP7|AP3M1_CHICK	1	1
